1 **Viduth K Chaugule<sup>1, 2\*</sup>, Connor Arkinson<sup>1, 2</sup>, Rachel Toth<sup>2</sup> and Helen Walden<sup>1, 2\*</sup>**

2 <sup>1</sup>Institute of Molecular, Cell and Systems Biology, College of Medical, Veterinary and Life

3 Sciences, University of Glasgow, Glasgow, UK

4 <sup>2</sup>MRC Protein Phosphorylation and Ubiquitylation Unit, College of Life Sciences

5 University of Dundee, Dundee, UK

6 \* Corresponding authors. E-mail: [helen.walden@glasgow.ac.uk](mailto:helen.walden@glasgow.ac.uk),

7 [viduth.chaugule@glasgow.ac.uk](mailto:viduth.chaugule@glasgow.ac.uk)

8

9 **Running title:** E2 allostery for specific ubiquitination

10 **Abstract**

11 In eukaryotes, DNA damage repair is implemented by a host of proteins that are coordinated  
12 by defined molecular signals. One such signal that transpires during the Fanconi Anemia  
13 (FA) - interstrand crosslink (ICL) repair pathway is the site-specific monoubiquitination of  
14 FANCD2 and FANCI proteins by a large, multi-protein FA core complex. The mechanics for  
15 this exquisitely specific monoubiquitin signal has been elusive. Here we show FANCL, the  
16 RING E3 module of the FA core complex, allosterically activates its cognate E2 Ube2T for  
17 monoubiquitination by a mechanism distinct from the typical RING-based catalysis. FANCL  
18 triggers intricate re-wiring of Ube2T's intra-residue network thus activating the E2 for  
19 precision targeting. This network is intrinsically regulated by conserved gates and loops  
20 which can be engineered to yield Ube2T variants that enhance FANCD2 ubiquitination by  
21 ~30-fold without compromising on target specificity. Finally, we also uncover allosteric  
22 networks in other ubiquitin E2s that can be leveraged by RING E3 ligases to drive specific  
23 ubiquitination.

24

25

26 **Keywords:** DNA repair / E2 / Enzyme allostery / RING E3 / Ubiquitination

## 27 **Introduction**

28 Ubiquitination is an essential, versatile and reversible post-translational modification system  
29 that enables eukaryotic cells to reprogram the fate and function of the modified protein and  
30 its connected pathway. The modification is accomplished by a sequential enzyme cascade  
31 wherein ubiquitin's C-terminus is first activated by an E1, is transferred onto the catalytic  
32 cysteine of an E2 conjugase (E2~Ub) and finally E3 ligases mediate the covalent attachment  
33 of ubiquitin onto a target lysine residue (Hochstrasser, 2009; Pickart, 2001). The Really  
34 Interesting New Gene (RING) ligase proteins represent the largest E3 family (~600 members)  
35 which share a zinc coordinating cross-brace motif termed RING domain (Freemont, 2000).  
36 Mechanistically, while non-RING elements of E3 ligases specify the substrate, the RING  
37 domains bind an E2 surface distal from the E2 active site and indirectly induce substrate  
38 ubiquitination by stabilizing a productive E2~Ub conformation (Metzger et al., 2014).  
39 Moreover, any of the seven surface lysine residues on ubiquitin or its N-terminus can be  
40 targeted to build polyubiquitin chains, thus enabling diverse signals (Kulathu and Komander,  
41 2012). Typically, RING-E2 interactions are found to be transient thus allowing E3s to switch  
42 their E2 partners in order to assemble polyubiquitin signals on the substrate (Brown et al.,  
43 2014; Kelly et al., 2014; Rodrigo-Brenni and Morgan, 2007; Windheim et al., 2008). Around  
44 35 ubiquitin E2s are found in mammals, several of which build chains (Stewart et al., 2016).  
45 Mechanisms of chain-assembly are well understood and generally involve additional non-  
46 covalent interactions between the E2 and the acceptor ubiquitin surface proximal to the  
47 linkage site (Eddins et al., 2006; Liu et al., 2014; Middleton and Day, 2015; Petroski and  
48 Deshaies, 2005; Rodrigo-Brenni et al., 2010; Wickliffe et al., 2011). In contrast however, far  
49 less is known about how RING E3-E2 enzyme pairs attach a single ubiquitin directly on the  
50 substrate surface in the case of monoubiquitination.

51 Site-specific monoubiquitin signals feature prominently in fundamental DNA damage  
52 response pathways (Al-Hakim et al., 2010; Uckelmann and Sixma, 2017). In eukaryotes, the  
53 repair of toxic DNA interstrand cross-links (ICL) is mediated by the Fanconi Anemia (FA)  
54 pathway, defects in which give rise to FA, a genome instability disorder typified by bone  
55 marrow failure and high predisposition to cancers (Garaycochea and Patel, 2014; Kottemann  
56 and Smogorzewska, 2013). A key event in FA-ICL damage response is the site-specific  
57 mono-ubiquitination of two large (~160kDa) structurally homologous proteins, FANCD2  
58 (Garcia-Higuera et al., 2001) and FANCI (Sims et al., 2007; Smogorzewska et al., 2007)  
59 (Lys561 and Lys523 respectively in humans), that signals the recruitment of repair factors  
60 (Ceccaldi et al., 2016). The specific modification is mediated by the RING bearing protein  
61 FANCL, present within a nine-protein FA core-complex E3 ligase (FANCA-FANCG-  
62 FAAP20-FANCC-FANCE-FANCF-FANCB-FANCL-FAAP100) and the E2 Ube2T  
63 (Machida et al., 2006; Meetei et al., 2003; Walden and Deans, 2014). FANCL's central  
64 region, a bi-lobed UBC (Ubiquitin conjugation fold)-RWD domain, facilitates direct  
65 FANCD2/FANCI interaction (Cole et al., 2010; Hodson et al., 2011) while the C-terminal  
66 RING domain selectively binds Ube2T over other E2's (Hodson et al., 2014). Further,  
67 genetic mutations in Ube2T, a Class III E2 with an unstructured C-terminal extension, have  
68 recently been linked to a FA phenotype (Hira et al., 2015; Rickman et al., 2015; Virts et al.,  
69 2015). Accordingly, in *in vitro* assays, the isolated FANCL and Ube2T enzymes catalyse  
70 FANCD2 monoubiquitination, although the modification levels are unexpectedly low (Alpi et  
71 al., 2008; Hodson et al., 2014). Studies in frog egg extracts show majority of FANCD2 is  
72 present in complex with FANCI (Sareen et al., 2012) while the cell based data indicate mono-  
73 ubiquitination of either protein requires the presence of the partner (Alpi and Patel, 2009).  
74 However, a crystal structure of the mouse FANCI-FANCD2 complex reveals an extended  
75 heterodimer interface which buries the respective target lysine (Joo et al., 2011). Notably, the

76 addition of structured or duplex DNA greatly stimulates FANCD2 ubiquitination and requires  
77 the presence of FANCI (Longerich et al., 2014; Sato et al., 2012). The DNA binding  
78 propensity of the FANCI-FANCD2 complex, absent in FANCL or Ube2T, is proposed to  
79 induce local reconfiguration that could improve FANCL's access to the target sites. Finally,  
80 while FANCL alone induces low levels of ubiquitination, however when in a FANCB-  
81 FANCL-FAAP100 sub-complex FANCD2 monoubiquitination levels improve by around 5-  
82 fold. The added presence of a FANCC-FANCE-FANCF sub-complex progressively enhances  
83 the tandem mono-ubiquitination of the FANCD2-FANCI complex (Rajendra et al., 2014; van  
84 Twest et al., 2017). Thus, in the current model the presence of DNA, FANCI and additional  
85 FA sub-complexes are all required for the modification however, underlying mechanisms for  
86 the sub-complex induced enhancement are not well understood. First, FANCL dependent  
87 FANCD2 ubiquitination has been observed in non-vertebrate species which lack an intact FA  
88 core-complex, suggesting in part that the mechanism for the specific ubiquitination is  
89 encoded within FANCL (Sugahara et al., 2012; Zhang et al., 2009). Second, global proteomic  
90 profiling have uncovered several other lysine on human FANCD2 (22 sites) and FANCI (44  
91 sites) that are ubiquitinated *in vivo* indicating the surface of both proteins are viable acceptors  
92 (Kim et al., 2011; Udeshi et al., 2013). As ubiquitin signalling is influential in almost every  
93 cellular process in eukaryotes, a major unanswered question is how specific signals are  
94 assembled and regulated. The FA-ICL repair pathway is crucial for cellular homeostasis thus,  
95 understanding how FANCL targets precise FANCD2 and FANCI sites for strict  
96 monoubiquitination would provide valuable insights into the mechanics of this crucial DNA  
97 damage response signal as well as how target and signal specificity is achieved in  
98 ubiquitination.

99 In this study we show that FANCL activates Ube2T for ubiquitination through an allosteric  
100 mechanism that is distinct from the typical RING E3 based catalysis. We find that in addition

101 to the selective FANCL RING-Ube2T interface, there are multiple E2-E3 interactions that  
102 perturb the resting state of Ube2T to induce activity. Residue network analysis reveals subtle  
103 reconfigurations of Ube2T's internal connections that link the effect of FANCL binding to  
104 the E2's catalytic centre culminating in substrate ubiquitination. We further uncover intrinsic  
105 regulation of this network by conserved Ube2T residues, and through rationally designed  
106 mutations we can enhance FANCL mediated FANCD2 (~30 fold) and FANCI (~16 fold)  
107 mono-ubiquitination without compromising its specificity. Finally, we identify similar  
108 allosteric networks in other ubiquitin E2s that are appropriated by RING E3 ligases to drive  
109 specific ubiquitination events.

110

## 111 **Results**

### 112 **The E2 – E3 pair Ube2T – FANCL ubiquitinates its substrates via an atypical** 113 **mechanism**

114 Previous *in vitro* studies using recombinant chicken (Alpi et al., 2008; Sato et al., 2012), frog  
115 (Hodson et al., 2014) and human (Longerich et al., 2014) proteins report the isolated FANCL  
116 enzyme with Ube2T directs FANCD2 monoubiquitination at its physiological target site.  
117 However, the underlying mechanism for the site-specific and strict mono-modification is  
118 unclear. In order to understand how the Ube2T and FANCL enzyme pair catalyse this  
119 specific signal we reconstituted a minimal E2 – E3 module with human proteins. Based on  
120 our earlier work we designed and purified a FANCL URD-RING fragment (FANCL<sup>UR</sup>,  
121 residues 109-375) that is stable, monomeric (Supplementary Fig 1A) and comprises both the  
122 substrate (UBC-RWD domain) and the E2 (RING domain) binding regions (Hodson et al.,  
123 2011; Hodson et al., 2014). We then tested the activity of the FANCL<sup>UR</sup> fragment in *in vitro*  
124 FANCD2 ubiquitination assays using fluorescently labelled ubiquitin (Ub<sup>IR800</sup>). Previous  
125 studies have shown the additional requirements of FANCI and DNA in complex with  
126 FANCD2 for efficient monoubiquitination of this substrate. Consistent with this we observe  
127 Ube2T – FANCL<sup>UR</sup> mediated FANCD2 modification when present as a FANCD2-FANCI-  
128 dsDNA complex (Fig 1A). Further, an arginine mutant of the physiological FANCD2 target  
129 site (FANCD2 K561R) prevents ubiquitination thus confirming the minimal E2 – E3 module  
130 is both active and site-specific. We wondered if the FANCL<sup>UR</sup> fragment could also  
131 specifically ubiquitinate FANCI present in the FANCD2-FANCI-dsDNA complex. To test  
132 this we titrated increasing amounts of the E2 – E3 module in reactions containing single  
133 target site complexes (FANCI<sup>K523R</sup>-FANCD2 or FANCI-FANCD2<sup>K561R</sup>). FANCL<sup>UR</sup> clearly  
134 favours modification of the FANCD2 site (Fig 1B). In contrast, FANCL<sup>UR</sup> can drive the site-  
135 specific ubiquitination of an isolated FANCI-dsDNA complex (Fig 1C), as previously

136 observed (Longerich et al., 2014). Therefore, unless otherwise stated, all FANCD2 assays are  
137 in the presence of FANCI and dsDNA, while FANCI assays are in the presence of dsDNA.  
138 RING E3 ligases catalyse ubiquitination by activating the thioester linked E2~ubiquitin (Ub)  
139 intermediate. In brief, RING binding of E2~Ub induces the thioester linked Ub to fold back  
140 over the E2 wherein the Ile44-centered hydrophobic patch of ubiquitin packs against a central  
141 E2 helix. Concomitantly, a ‘linchpin’ RING E3 residue (usually Arg/Lys) contacts both E2  
142 and Ub to stabilise the ‘closed’ E2~Ub conformer, thus priming the thioester for lysine attack  
143 (Dou et al., 2012; Plechanovova et al., 2012; Pruneda et al., 2012; Saha et al., 2011).  
144 Interestingly, FANCL lacks this linchpin harbouring instead a serine residue (S363) at the  
145 analogous position (Supplementary Fig 1B). We therefore wondered if in the absence of a  
146 linchpin residue the Ub Ile44 patch requirement is maintained for FANCL’s E3 activity. To  
147 test this we compared FANCI and FANCD2 ubiquitination activity of the Ube2T –  
148 FANCL<sup>UR</sup> pair with the well characterised E2 – E3 pair Ube2D3 – RNF4<sup>RING-RING</sup> (Branigan  
149 et al., 2015; Plechanovova et al., 2011; Plechanovova et al., 2012). While a FANCI-  
150 FANCD2-DNA complex is robustly ubiquitinated by Ube2D3 – RNF4<sup>RING-RING</sup>, the Ile44Ala  
151 Ub mutant dramatically reduces this modification (Fig 1D). Remarkably, the ubiquitin mutant  
152 barely impacts the activity or site-specificity of the Ube2T-FANCL<sup>UR</sup> pair. These data reveal  
153 that while Ube2T–FANCL can catalyse specific ubiquitination it does not share features of  
154 the generic RING E3 based catalysis and instead operates through an as yet uncharacterised  
155 mechanism.

156

### 157 **FANCL stimulates Ube2T activity through allosteric modulation**

158 As the minimal Ube2T–FANCL<sup>UR</sup> module drives FANCI and FANCD2 monoubiquitination,  
159 we wondered if the underlying mechanism for specific ubiquitination could be uncovered by



160 understanding FANCL's atypical catalytic mechanism. To investigate this we compared  
161 available structures of unbound and the FANCL bound E2. High resolution crystal structures  
162 of Ube2T alone (PDB ID 1yh2) (Sheng et al., 2012) and bound to FANCL RING domain  
163 (FANCL<sup>R</sup>, PDB ID 4ccg) (Hodson et al., 2014) show little overall difference in their UBC  
164 folds (residues 1-152). The latter contains two E2 copies in the asymmetric unit, both of  
165 which superpose well onto the unbound state (RMS deviation 0.6-0.9Å). However, RING  
166 binding induces some local changes in Ube2T's helix1-loop2 region as well as in loops 7 and  
167 8 that flank the active site (Fig 2A). Residues in these shifted regions (R3, L7, D32, D33,  
168 K91-K95 and D122) are predominantly surface exposed and largely conserved among the  
169 Ube2T homologs (Supplementary Fig 1C). We wondered if these subtle conformational  
170 changes are important for FANCL's catalytic mechanism. To test this we made and assayed  
171 Ube2T mutants in FANCI and FANCD2 ubiquitination assays. Surprisingly, alanine  
172 substitutions of residues Arg3, Asp32/Asp33 and Leu92 reduce the rate of  
173 monoubiquitination by 25 to 50% while a loop7 deletion ( $\Delta$ 92-95) causes a more severe  
174 defect (Fig 2B-C and Supplementary Fig2A). Interestingly, a loop2-loop7 hybrid mutant  
175 (D32A, D33A, L92A or DDL/AAA) attenuates both FANCI and FANCD2 ubiquitination  
176 rates by around 75%. It is possible that these substrate ubiquitination defects arise from the  
177 mutations impairing intrinsic E2 features, such as ubiquitin charging and discharging. The  
178 levels of E1-based Ub charging for the above Ube2T mutants is similar to the wildtype E2  
179 (Supplementary Fig 2B). Ube2T readily autoubiquitinates at Lys91, close to the active site  
180 (Fig 2A), and several lysines in its C-terminal extension (Machida et al., 2006). We therefore  
181 purified an E2 truncation (Ube2T<sup>1-152</sup>) lacking the C-terminal tail. This truncated enzyme  
182 targets Lys91 and can be used to assess E2~Ub discharge. In E3-independent Ube2T<sup>1-152</sup>  
183 autoubiquitination assays, a Lys91Arg mutation (Ube2T<sup>1-152</sup> K91R) abolishes the  
184 automodification while the DDL/AAA mutation (Ube2T<sup>1-152</sup> DDL/AAA) has no observable

185 effect (Fig 2D). Thus in the absence of FANCL, the Ube2T<sup>DDL/AAA</sup> mutant can load and  
186 offload ubiquitin comparable to wildtype Ube2T. Conversely, in single turnover reactions,  
187 the mutant E2~Ub thioester (Ube2T<sup>1-152, K91R</sup> DDL/AAA ~ Ub) is less effective in FANCL<sup>UR</sup>  
188 mediated FANCD2 ubiquitination even in the presence of increasing amounts of the E3 (Fig  
189 2E).

190 We wondered if this disparity arises from FANCL being sensed differently by the mutant  
191 Ube2T. To uncover possible differences we analysed interactions of wildtype and  
192 DDL/AAA mutant Ube2T with the FANCL<sup>UR</sup> fragment in solution and observe similar  
193 affinities ( $K_d \sim 119$  nM) indicating that the RING-Ube2T crystal interface is maintained in  
194 case of the Ube2T<sup>DDL/AAA</sup> (Fig 2F). However, the thermodynamics are fundamentally  
195 different as the mutant interaction is enthalpically favoured ( $\Delta H = -1.65$  kcal/mol) in contrast  
196 to the unfavourable signature observed for wildtype Ube2T ( $\Delta H = + 6.46$  kcal/mol) (Fig 2F,  
197 Table 1). The shorter FANCL<sup>R</sup> fragment also binds with  $\sim 250$  nM affinity but shows a  
198 similar divergent enthalpy profile (Supplementary Fig 2C). In both FANCL<sup>UR</sup> and FANCL<sup>R</sup>  
199 experimental sets there appears to be strong enthalpy – entropy compensation and  
200 consequently the binding energy ( $\Delta G$ ) within each set is unchanged (Table 1). Therefore, the  
201 net differences in observed entropy between wildtype and DDL/AAA Ube2T (8.12 and 6.73  
202 kcal/mol for FANCL<sup>UR</sup> and FANCL<sup>R</sup> complexes respectively) could arise from either  
203 reduced solvent reordering or fewer local conformational changes in the mutant E2 upon  
204 FANCL binding. In other words, the Ube2T<sup>DDL/AAA</sup> mutant indeed senses FANCL differently  
205 from wildtype Ube2T. The biochemical and thermodynamic data taken together reveal that  
206 FANCL induces FANCI and FANCD2 ubiquitination by perturbing the overall resting state  
207 of Ube2T and strongly suggests allostery. Moreover, FANCL binding indirectly effects  
208 Ube2T's loop2 and loop7 which are 16 – 20Å apart (Fig 2A) and these regions, operating in  
209 synergy, propagate the catalytic influence of the E3.

210

## 211 **Ube2T backside regulates FANCL mediated FANCD2 ubiquitination**

212 Our binding analyses reveal a 2-fold enhanced Ube2T affinity for the FANCL<sup>UR</sup> fragment  
213 over the smaller RING domain (Table 1, Supplementary Fig 2C) indicating additional  
214 interactions exist between a non-RING element and the E2. In several RING E3s, auxiliary  
215 elements outside of the RING domain can modulate ubiquitination by binding an E2  
216 ‘backside’ surface which is located opposite the active site (Brown et al., 2015; Das et al.,  
217 2009; Hibbert et al., 2011; Li et al., 2015; Li et al., 2009; Metzger et al., 2013; Turco et al.,  
218 2015). We wondered if the analogous Ube2T backside surface could extend the FANCL-E2  
219 interface as well as influence FANCI and FANCD2 ubiquitination. Beta-strands 1 and 2 of  
220 the UBC-fold prominently feature in E3 – backside E2 complexes (PDB IDs 3h8k, 2ybf,  
221 4jqu, 5d1k and 4yii) and at the canonical ubiquitin – backside E2 interface (PDB IDs 2fuh  
222 and 4v3l). The equivalent Ube2T surface is hydrophobic, semi-conserved (Supplementary  
223 Fig 1C) with certain side-chains ( $\beta$ 1 – T23, W25 and  $\beta$ 2 – R35, Q37) repositioned upon  
224 FANCL<sup>R</sup> binding (Fig 3A). Notably, the mutation of Ube2T  $\beta$ 1 (T23R+W25Q or TW/RQ)  
225 reduces the E2’s affinity for FANCL<sup>UR</sup> ( $K_d$  – 200 nM) but not for FANCL<sup>R</sup> (Fig 3B, Table  
226 1). Thus, the Ube2T backside indeed supports additional interactions with FANCL<sup>UR</sup> beyond  
227 the RING domain. Unexpectedly, the backside mutants have different effects on substrate  
228 ubiquitination. Previous *in vitro* studies have reported site-specific ubiquitination of a  
229 FANCI/DNA complex by Ube2T in the absence of FANCL (Longerich et al., 2014). In our  
230 setup, FANCL<sup>UR</sup> enhances FANCI ubiquitination rates by around two-fold while backside  
231 Ube2T mutants mitigate this improvement (Fig 3C-D and Supplementary Fig 3A). In  
232 contrast, the Ube2T TW/RQ mutant slows FANCD2 ubiquitination by over three-fold,  
233 similar to the DDL/AAA mutant (Fig 2B-C). We also tested a  $\beta$ 2 mutant (Q37L), designed to  
234 extend the hydrophobic backside surface, and observe little change in ubiquitination rates

235 (Fig 3C, D). Overall, the backside Ube2T mutants do not affect ubiquitin charging or  
236 Ube2T<sup>1-152</sup> auto-ubiquitination (Supplementary Fig 3A and 3E) and therefore indicate the  
237 ubiquitin loading/offloading properties of the mutants are intact. Hence, the observed defects  
238 in substrate modification are likely linked to an altered FANCL<sup>UR</sup>-backside Ube2T  
239 interaction. We wondered if the weakened Ube2T TW/RQ-FANCL<sup>UR</sup> interaction is solely  
240 responsible for reduced FANCD2 ubiquitination. In single-turnover reactions, the charged  
241 Ube2T<sup>1-152, K91R</sup> TW/RQ ~ Ub thioester is weakly activated by FANCL<sup>UR</sup> for FANCD2  
242 ubiquitination however, increasing the amount of E3 does not completely rescue the defect  
243 (Fig 3F). Thus, Ube2T's backside surface not only supports FANCL<sup>UR</sup> interaction but likely  
244 augments the allosteric activation of the E2~Ub thioester by the E3. In summary, loop2,  
245 loop7 and the backside of Ube2T together respond to FANCL binding to facilitate FANCI  
246 and FANCD2 ubiquitination.

247

## 248 **FANCL potentiates Ube2T active site residues for FANCI AND FANCD2**

### 249 **ubiquitination**

250 The above data reveal how the FANCL influence on distinct Ube2T surfaces triggers the  
251 E2~Ub for substrate ubiquitination. Thus a long-range residue network could connect these  
252 distal sites with the E2 catalytic centre. To uncover the likely path we generated residue  
253 interaction networks (RINs) for the free and RING bound Ube2T structures (residues 1-152)  
254 (Doncheva et al., 2011; Piovesan et al., 2016). In these networks, each Ube2T residue is  
255 represented as a node while the connecting edges are potential physicochemical interactions  
256 with its tertiary structure environment. The total connections in both free and RING bound  
257 E2 RINs are similar, averaging 1430 edges, however a comparison matrix reveals unchanged  
258 and altered edges (Fig 4A, Supplementary Dataset 1), the latter used to build a dynamic

259 network. We then choose Phe63, a core E2 residue at the Ube2T-FANCL<sup>R</sup> interface (Hodson  
260 et al., 2014), as the starting node to trace its first neighbours which serve as subsequent  
261 search nodes. By iteration, we trace the possible paths to the E2 catalytic centre, focusing on  
262 the allosteric and conserved nodes while filtering out paths comprising distal and dead-end  
263 nodes. The final allosteric network model (39 nodes, 79 dynamic edges) reveals how  
264 FANCL<sup>R</sup> binding rewires Ube2T's intra-molecular connections (Fig 4A, Supplementary  
265 Table 1).

266 The network terminals, located in the catalytic beta-element (R84), loop7 (K91, K95), loop8  
267 and its C-terminal hinge (D122 and L124 respectively) are within 10Å of Ube2T's catalytic  
268 cysteine (C86) and vary among the ubiquitin E2s (Fig 4A and Supplementary Fig 4B). To  
269 empirically test the network model we made alanine mutants of the said network termini and  
270 observe a striking loss in FANCL mediated FANCI and FANCD2 ubiquitination (Fig 4B).  
271 Given their proximity to the active site these Ube2T residues could also influence intrinsic E2  
272 activity. The Leu124Ala mutation is detrimental to E1-based ubiquitin charging and suggests  
273 the hydrophobic side-chain braces Ube2T's active site for optimal activity (Fig 4C).

274 Moreover, by examining E3-independent E2~Ub thioester discharge onto free lysine, we  
275 observe subtle catalytic defects with the loop7 (Ube2T<sup>1-152</sup> K91A+K95A) and loop8 (Ube2T<sup>1-  
276 152, K91R</sup> D122A) mutants while in contrast, the Arg84Ser (Ube2T<sup>1-152, K91R</sup> R84S) mutant did  
277 not affect Ube2T's aminolysis activity (Fig 4D and Fig Supplementary Fig 4C). In some E2s,  
278 the loop8 acidic residue is required to position and/or deprotonate the target lysine for  
279 modification (Plechanovova et al., 2012; Valimberti et al., 2015; Yunus and Lima, 2006).

280 The loop8 Asp122 in Ube2T could support a similar role and account for the catalytic defects  
281 with this mutant. However, the contrasting E2 activity profiles (E3-independent free lysine  
282 versus E3-dependent substrate lysine, Fig 4B and D) for the catalytic beta-element mutant  
283 (R84S) suggests the Arg84 residue is likely involved in FANCL's activation mechanism.

284 Moreover, as we earlier observe the Leu92Ala loop7 mutant of Ube2T reduces FANCL  
285 mediated substrate ubiquitination (Fig 2B-C) we reasoned the E3's activation mechanism  
286 feeds into the catalytic role of this loop (Fig 4A, D).

287 To understand roles of Ube2T residues Arg84, Lys91 and Lys95 in substrate ubiquitination  
288 we undertook systematic mutagenesis and uncover the requirements of Lys/Arg in loop7  
289 while the Arg84 residue is indispensable for FANCL mediated FANCI and FANCD2  
290 ubiquitination (Fig 4E). To clarify this necessity we analysed the total network (unchanged  
291 and altered) for the Arg84 node (Supplementary Fig 4D). In free Ube2T, the Arg84 side-  
292 chain stabilises the Asp80-Gly83 loop and is transiently redirected towards Cys86 upon  
293 RING binding (Fig 4A, Supplementary Fig 4B and 4D). A Arg84Lys mutation would, in  
294 theory, preserve the free E2 network but the persistent defect in substrate ubiquitination (Fig  
295 4E) suggests the shorter Lys side-chain is unable to optimally participate at the active site.  
296 Interestingly, the introduction of longer Arg side-chains in loop7 (R84K, K91R, K95R) can  
297 rescue the Arg84Lys defect, albeit partially (Fig 4E). In summary, FANCL binding  
298 potentiates the Ube2T active site residues R84, K91 and K95 to induce FANCI and FANCD2  
299 ubiquitination. These residues could enhance catalysis either through transient interactions  
300 with acidic/polar substrate residues proximal ( $<12\text{\AA}$ ) to the respective target lysine  
301 (Supplementary Fig 4C) and/or stabilise the developing oxyanion hole in the E2~Ub – target  
302 lysine transition state. Taken together, the data reveals the existence of an elaborate Ube2T  
303 residue network that propagates FANCL's catalytic influence in activating the E2~Ub  
304 thioester for ubiquitination.

305

306 **Ube2T network analysis reveals regulatory and FANCL induced activation mechanisms**

307 The thermodynamics of Ube2T-FANCL interaction and the allosteric network model together  
308 illustrate how the E3 could remotely effect the E2 catalytic centre by inducing a series of  
309 subtle conformational changes within Ube2T. Intriguingly, we noticed a dynamic conduit  
310 involving nodes Arg35 – Glu54 – Arg69 that appear to propagate FANCL's influence on the  
311 RING and backside clusters to the catalytic beta-element (Fig 4A, Supplementary Table 1).  
312 In particular, the Glu54 side-chain which engages both Arg35 and Arg69 in unbound Ube2T  
313 has a reduced influence in the RING bound state. Subsequently, the Arg69 side-chain is  
314 liberated to stabilise the catalytic beta-element backbone thus releasing the Arg84 side-chain  
315 to optimally participate at the catalytic centre (Fig 5A). In other words, an Arg69 effector role  
316 in Ube2T's resting state could be gated by Glu54 and relieved upon FANCL binding thereby  
317 activating the E2~Ub for FANCI and FANCD2 ubiquitination. Based on this model we  
318 predict the removal of residue 54's acidic side-chain should positively impact substrate  
319 ubiquitination. We tested the proposed allosteric conduit using Glu54Ala/Gln mutations and  
320 observe a marked improvement in FANCL<sup>UR</sup> mediated FANCI AND FANCD2  
321 ubiquitination while a conservative Glu54Asp mutant retained wild-type like activity (Fig  
322 5B). Even a charge-altering Glu54Arg mutation contributes to greater substrate ubiquitination  
323 and does not influence the Ube2T-FANCL<sup>UR</sup> interaction (Fig 5B, Table 1). Consequently, an  
324 Arg69Ala mutation reduces FANCI and FANCD2 ubiquitination, while a conservative  
325 mutation (R69K) rescues this defect and is further improved by eliminating the gating effect  
326 (E54A with R69K) thus confirming residue 69's effector role (Fig 5C). Furthermore,  
327 disrupting the Glu54 gate can rescue FANCD2 ubiquitination defects arising from both RING  
328 allostery (DDL/AAA) and backside binding (TW/RQ) mutants (Fig 5D). Interestingly, a  
329 RING binding E2 mutant (F63A) that reduces Ube2T-FANCL<sup>R</sup> binding by over ten-fold  
330 (Hodson et al., 2011) could also be activated by FANCL<sup>UR</sup> for FANCD2 ubiquitination by  
331 using a permissive gate (F63A with E54R) (Fig 5D).

332 We wondered if such gated networks exists in other E2s, in particular those that assemble  
333 specific ubiquitination signals. For example, DNA damage tolerance pathways are initiated  
334 upon specific Lys164 monoubiquitination of Proliferating Cell Nuclear Antigen (PCNA)  
335 protein by the E2-E3 enzyme pair Ube2B/Rad6-RAD18 (Ulrich and Walden, 2010). The  
336 RAD18-Ube2B interaction is bimodal, primarily via the canonical RING-E2 interface and  
337 supported by a helical Rad6 binding domain (R6BD) that packs against the E2's backside  
338 (Hibbert et al., 2011; Huang et al., 2011). We compared the R6BD bound (PDB ID 2ybf)  
339 structure/RIN with the free Ube2B (PDB ID 2yb6) and noticed Glu58 and Arg71 of the E2  
340 could potentially operate as gating and effector residues respectively (Supplementary Fig 5A,  
341 Supplementary Dataset 2). Notably in *in vitro* assays, the Ube2B variant with a permissive  
342 gate (E58R) is more sensitive to Rad18 in PCNA monoubiquitination without comprising  
343 site-specificity (Supplementary Fig 5A). These results together demonstrate that different  
344 E2's contain long-range RINs that are regulated by internal gates. Furthermore, these  
345 networks can be leveraged by RING E3 ligases to allosterically drive ubiquitination of  
346 specific targets.

347 A short-range RIN is also apparent between Ube2T residues that support RING binding and  
348 those in loop7 (Fig 4A, Supplementary Table 1). The binding of FANCL<sup>R</sup> draws loop7  
349 (K<sub>91</sub>LPPK<sub>95</sub>) away from the active site (Fig 2A) thereby repositioning the flanking Lys  
350 residues (K91 and K95) presumably for target site binding, while paradoxically these  
351 residues are also needed at the active site for optimal Ube2T catalysis (Fig 4C). Also present  
352 in this loop are two conserved proline residues (P93 and P94, Supplementary Fig 1C) that  
353 maintain loop rigidity and we hypothesise that a plastic loop7 could emulate its dynamic  
354 requirements during ubiquitination. In multi-turnover assays, the Ube2Tv1 variant with a  
355 permissive gate (E54R) improves FANCL<sup>UR</sup> driven FANCD2 ubiquitination by around 15-  
356 fold (around 4-fold for FANCI) while a hybrid Ube2Tv3 variant that includes both a



357 permissive gate and flexible loop7 (E54R, P93G, P94G) further enhances activity by 2 to 4-  
358 fold (Fig 5E and Supplementary Fig5B) thus validating our hypothesis. The above data reveal  
359 distinct regulatory mechanisms in operation within Ube2T's allosteric network and these can  
360 be repurposed to yield E2 variants with enhanced catalytic potential. Furthermore, the  
361 enhanced Ube2Tv3 – FANCL<sup>UR</sup> pair facilitates steady and site-specific ubiquitination of the  
362 isolated FANCD2 and FANCI proteins in the absence of any DNA cofactors (Fig 5F). Recent  
363 reports reveal the *in-vitro* requirements of a large (~ 0.8 MDa), multi-protein E3 super-  
364 assembly (FANCB-FANCL-FAAP100-FANCC-FANCE-FANCF) that activates the  
365 Ube2T~Ub thioester for robust ubiquitination of a FANCI-FANCD2-DNA complex (Swuec  
366 et al., 2017; van Twest et al., 2017). By investigating the catalytic mechanism of the core E2  
367 – E3 proteins within this super-assembly i.e. Ube2T – FANCL, we have rationally engineered  
368 a minimal module (Ube2Tv3 – FANCL<sup>UR</sup>, ~ 0.05 MDa) with enhanced catalytic ability to  
369 autonomously, specifically and efficiently mono-ubiquitinate FANCI or FANCD2. Using this  
370 simplified setup we can now systematically examine roles of the FA core-complex members  
371 in ubiquitination, biochemically and structurally characterize the natively ubiquitinated  
372 FANCI and FANCD2 substrates, identify novel readers of the ubiquitin signal that implement  
373 DNA repair as well as understand how this specific signal is removed by the cognate  
374 deubiquitinating enzyme USP1 (Nijman et al., 2005).

375

## 376 **Discussion**

377 Understanding the mechanisms for site-specific FANCD2 and FANCI mono-ubiquitination  
378 would shed light on how this decisive DNA damage response signal is mediated by the multi-  
379 protein FA core-complex as well as divulge ubiquitination strategies used in precision  
380 targeting. Our previous studies on FANCL, the catalytic RING-bearing subunit in the FA

381 core-complex, revealed substrate binding via its central UBC-RWD domain (Hodson et al.,  
382 2011). Moreover, an extended RING-E2 interface underlies the strong E3-E2 affinity and  
383 enables FANCL to specify its E2 partner Ube2T (Hodson et al., 2014). However, the  
384 mechanism by which FANCL catalyses monoubiquitination at specific FANCD2 and FANCI  
385 sites, a key signal in the FA-ICL repair pathway (Ceccaldi et al., 2016), is poorly understood.  
386 In this study we expand the functional significance of the intimate FANCL-Ube2T interaction  
387 and uncover an atypical mechanism behind substrate ubiquitination.

388 Unlike other RING E3s, FANCL lacks the conserved linchpin residue (Arg/Lys) essential for  
389 stabilizing a closed and productive E2~Ub conformation (Metzger et al., 2014). This suggests  
390 FANCL's RING domain may not activate most E2~Ub intermediates thus precluding any  
391 non-specific modification or the assembly polyubiquitin signals on the FANCI and FANCD2  
392 substrates. Despite missing this feature FANCL does activate Ube2T for site-specific  
393 substrate ubiquitination. Using thermodynamic and residue network analysis we demonstrate  
394 how FANCL's high-affinity grasp of Ube2T induces a series of subtle conformational  
395 changes within the E2 that are relevant for substrate ubiquitination. These changes transpire  
396 through altered intra-residue connections between conserved Ube2T residues, revealing a  
397 dynamic allosteric network that links FANCL binding to the E2 catalytic centre. Notably,  
398 conserved basic residues (Arg84, Lys91 and Lys95) proximal to Ube2T's catalytic cysteine  
399 (Cys86) are repositioned in the FANCL<sup>R</sup> bound structure. While these residues partially  
400 contribute to intrinsic Ube2T activity, they are critical for FANCL induced FANCD2 and  
401 FANCI ubiquitination. Several studies on site-specific histone monoubiquitination  
402 mechanisms show how interactions between RING domain residues and the substrate surface  
403 guide the catalytic RING-E2~Ub complex to a lysine targeting zone (Bentley et al., 2011;  
404 Gallego et al., 2016; Mattioli et al., 2014; Mattioli et al., 2012; McGinty et al., 2014). The  
405 FANCL-Ube2T complex is similar in that substrate docking by FANCL's UBC-RWD

406 module could restrict the global targeting area of the RING bound Ube2T. However, unique  
407 to this E3-E2 pair is FANCL RING allostery which reorients the basic residues near Ube2T's  
408 active-site, which could facilitate local contacts with conserved acidic/polar  
409 FANCD2/FANCI residues in the vicinity of the target lysine, thus directing specific  
410 ubiquitination. It remains to be seen if other RING E3s can actively repurpose E2 residues for  
411 specific lysine targeting. However, this strategy of E2-guided lysine targeting mirrors those  
412 observed in autonomous polyubiquitin assembling E2s where the acceptor ubiquitin surface  
413 around the target lysine is homed by auxiliary E2 interactions (Eddins et al., 2006; Liu et al.,  
414 2014; Middleton and Day, 2015; Petroski and Deshaies, 2005; Rodrigo-Brenni et al., 2010;  
415 Wickliffe et al., 2011). Alternatively, given the necessity of DNA cofactors in  
416 FANCI/FANCD2 modification (Liang et al., 2016; Longerich et al., 2014; Sato et al., 2012),  
417 a DNA sensing role for these Ube2T basic residues cannot be ruled out. In either scenario,  
418 post-ubiquitination the local target zone for the FANCL-Ube2T complex is occluded by the  
419 attached mono-ubiquitin. As we do not observe continual modification, either on a different  
420 substrate lysine or the installed ubiquitin, we propose neither surface is efficiently recognized  
421 by the FANCL-Ube2T complex thus limiting the ubiquitination to a single event.

422 Further, we uncover residues on Ube2T's backside ( $\beta 1$  and  $\beta 2$ ) that support additional  
423 interactions with FANCL and feature in the E2's allosteric network. It is likely that the  
424 backside Ube2T binding is mediated by FANCL's UBC-RWD domain which also docks onto  
425 the substrate surface. As the backside interaction is required for steady substrate  
426 ubiquitination, FANCD2 in particular, we speculate that additional UBC-RWD and Ube2T  
427 interactions could guide the E2~Ub to the substrate as well as allosterically activate the  
428 enzyme. Notably, these observations enlist Ube2T to the growing number of E2's whose  
429 ubiquitination activities are modulated by interactions outside of the classical RING-E2  
430 interface (Brown et al., 2015; Das et al., 2009; Hibbert et al., 2011; Li et al., 2015; Li et al.,

431 2009; Metzger et al., 2013; Turco et al., 2015). Finally, the network guided biochemical  
432 analysis also reveals the presence of dynamic long-range and short-range residue networks  
433 that are intrinsically regulated by conserved Ube2T residues. In particular, an allosteric gating  
434 residue in  $\beta 3$  and a rigid loop<sup>7</sup> appear to regulate the intensity of Ube2T activation by  
435 FANCL. Rationally engineered mutations of these regions give rise to deregulated Ube2T  
436 variants which are strikingly more responsive to FANCL in substrate ubiquitination, yet  
437 retain the lysine specificity observed with the wildtype E2. Notably, the catalytic enhanced  
438 Ube2T variants now support FANCL driven monoubiquitination of the isolated FANCD2  
439 and FANCI proteins without needing DNA cofactors. These data reveal the molecular  
440 strategies in place in Ube2T that prevent inadvertent and untimely mono-ubiquitin signals in  
441 the FA-ICL repair pathway. Taken together, we propose a model where FANCL binding at  
442 the canonical RING-E2 interface and the backside E2 surface rewires Ube2T's residue  
443 network and thus activates the enzyme for site-specific FANCI and FANCD2  
444 monoubiquitination (Fig. 5G).

445 On the basis of Ube2T's allosteric network we identify a similar regulated network in  
446 Ube2B/Rad6 that is altered by the RING E3 Rad18 for Lys164 PCNA mono-ubiquitination.  
447 Biochemical, structural and computational studies have revealed how RING/U-box E3s  
448 stimulate internal dynamics in different E2s that are linked to their ubiquitination activity  
449 (Benirschke et al., 2010; Chakrabarti et al., 2017; Das et al., 2013; Ozkan et al., 2005).  
450 Furthermore, recent efforts in fragment-based inhibitor discovery have revealed promising  
451 lead compounds that bind Ube2T (Morreale et al., 2017) as well as the unrelated Ube2I  
452 (Hewitt et al., 2016) at regions distal from their active/E3 binding sites, nevertheless can  
453 allosterically regulate the respective E2 activities. These observations collectively suggest  
454 that allosteric networks could operate across the E2 family and that future investigations into  
455 such networks could prove instrumental for basic and translational research in ubiquitin

456 biology. Using our Ube2T-gated network as a guide and the available E2 sequence/structural  
457 data, we propose at least 8 other ubiquitin E2s (Ube2- A, C, E1, E2, E3, K, L3 and N) contain  
458 a  $\beta$ 3 gating residue that is restrictive (Supplementary Fig 5C). In contrast, the small ubiquitin-  
459 like modifier (SUMO) E2 Ube2I and Interferon-stimulated gene 15 (ISG15) E2 Ube2L6  
460 appear to contain a permissive  $\beta$ 3 gate. Interestingly, opposing allosteric gates are apparent  
461 for the two neural precursor cell expressed developmentally downregulated protein 8  
462 (NEDD8) E2s Ube2F (restrictive) and Ube2M (permissive). Since the  $\beta$ 3 gating residue does  
463 not lie in the typical RING or backside binding regions, we speculate that targeting this  
464 residue would maintain E2-E3 interactions nevertheless, will yield E2 variants that differ in  
465 their enzymatic potential relative to their wildtype counterparts. Recent studies have utilized  
466 phage-display derived ubiquitin binding variants to uncover mechanistic insights for  
467 RING/U-box (Gabrielsen et al., 2017) and HECT (Zhang et al., 2016) E3s as well as  
468 deubiquitinating enzymes (Ernst et al., 2013). Along these lines, we propose the design  
469 principles for creating E2 activity variants that can be used in fundamental research and guide  
470 drug discovery studies.

471

## 472 **Materials and Methods**

### 473 **Cloning and mutagenesis of expression constructs**

474 Human Ube2T and Ube2D3 was cloned using PCR/restriction cloning into a modified pET15  
475 vector (Novagen) that express with a 6xHis-3C cleavage site at the N-terminus. Human  
476 Ube2B cDNA was as an I.M.A.G.E. clone (Geneservice) and cloned into a modified  
477 pDEST17 vector (Invitrogen), that express with a 6xHis-TEV cleavage site at the N-terminus  
478 using the Gateway Cloning kit (Invitrogen). A synthetic human FANCL sequence (GeneArt)  
479 optimized for *Escherichia coli* (*E. coli*) expression used as template to clone the FANCL<sup>UR</sup>  
480 (residues 109-375) and FANCL<sup>R</sup> (residues 289-375) coding regions into a pET SUMO

481 (Invitrogen) expression vector using restriction-free cloning (van den Ent and Lowe, 2006).  
482 These constructs express with a 6xHis-smt3 tag at the N-terminus. A synthetic human Rad18  
483 sequence (GeneArt) optimized for *Escherichia coli* expression was cloned using  
484 PCR/restriction cloning into a modified pET28a (Novagen), that express with 6xHis-smt3 tag  
485 at the N-terminus. A synthetic Human FANCD2 sequence (GeneArt) optimized for  
486 *Spodoptera frugiperda* (*Sf*) expression was cloned using PCR/restriction cloning into a  
487 pFastBac vector that express with a 6xHis-3C cleavage site at the N-terminus. Human  
488 FANCI (cDNA purchased as an I.M.A.G.E. clone, Geneservice) was cloned using  
489 PCR/restriction cloning into a pFastBac vector that express with a 6xHis-TEV cleavage site-  
490 V5 epitope at the N-terminus. Human PCNA template, a kind gift from Dr Svend Petersen-  
491 Mahrt (European Institute of Oncology, Milan), was cloned using PCR/restriction cloning  
492 into a pRSF Duet1 vector (Novagen), that express with a 6xHis at the N-terminus. Ubiquitin  
493 was cloned using PCR/restriction cloning into a modified pET28a vector (Novagen), that  
494 express with 6xHis-smt3 tag-SGCGSG overhang at the N-terminus for fluorescence labelling  
495 or into a modified pRSF Duet1 vector (Novagen), that express with a 6xHis-TEV cleavage  
496 site at the N-terminus. All desired mutagenesis were carried out by primer based PCR  
497 mutagenesis using KOD Hot Start DNA polymerase (Novagen) or Phusion High-Fidelity  
498 DNA polymerase (Thermo Scientific) following manufacturer's guidelines. Custom  
499 oligonucleotides for PCR and mutagenesis were obtained from Sigma Aldrich or IDT  
500 technologies. DH5 $\alpha$  *E. coli* strain were made chemically competent using CCMB80 buffer  
501 (TEKnova) using in-house protocols. The coding regions of all constructs and mutants were  
502 verified by DNA sequencing using MRC PPU DNA Sequencing and Services or Eurofins  
503 Genomics DNA sequencing services.

#### 504 **Expression and purification of recombinant proteins**

505 All E2, Ubiquitin and PCNA constructs were transformed into chemically competent BL21  
506 *E. coli* strains and cultured in Miller LB broth (Merck) at 37°C until OD<sub>600</sub> ~ 0.4 following  
507 which temperature was reduced to 16°C. At OD<sub>600</sub> ~ 0.8 protein expression was induced by  
508 adding a final concentration of 200 µM (for Ube2T and Ube2D3) or 500 µM (for Ube2B,  
509 Ubiquitin and PCNA) Isopropyl-Beta-d-Thiogalactopyranoside (IPTG, Formedium) and  
510 allowed to proceed for a further 16-18h. Similar steps were followed for all RING domain  
511 constructs except the growth media was supplemented with 250 µM ZnCl<sub>2</sub> and protein  
512 expression was induced at OD<sub>600</sub> ~ 1.0 with a final concentration of 50 µM IPTG. All  
513 purification steps, except for ubiquitin, were performed at 4°C and completed within 24-36  
514 hours of cell lysis.

515 Purification of all Ube2T variants and FANCL fragments are as described in (Hodson et al.,  
516 2011; Hodson et al., 2014). The respective affinity tags were cleaved using GST-3C protease  
517 (for Ube2T) and 6xHis-Ulp1 protease (for FANCL). Ube2B variants and PCNA were  
518 expressed and purified similar to Ube2T. The 6xHis tag was removed from Ube2B using  
519 6xHis-TEV protease. The 6xHis-smt3-Rad18 and 6xHis-MBP-rat RNF4 RING-RING  
520 proteins was purified as described elsewhere (Huang et al., 2011; Plechanovova et al., 2011).  
521 The 6xHis-smt3 was retained for RAD18 and protein concentration for both proteins were  
522 estimated using SDS-PAGE and coomassie staining using known protein standards of similar  
523 size.

524 Baculovirus were generated using the Bac-to-Bac (Invitrogen) system and proteins were  
525 expressed for ~72h in baculovirus infected *Sf21* cells. Cell pellets were suspended in lysis  
526 buffer (50 mM Tris-HCl pH8.0, 150 mM NaCl, 10 mM imidazole, 1 mM TCEP and 5% v/v  
527 glycerol with freshly added 2 mM MgCl<sub>2</sub>, EDTA-free Protease Inhibitor cocktail (Pierce) and  
528 Benzonase (Sigma Aldrich). *Sf21* cells were lysed by homogeniser followed by sonication in  
529 an ice-bath. All lysates were clarified at 40,000 RCF for 45 min at 4°C and filtered. Proteins

530 were bound to HisPur Ni-NTA Resin (Thermo Scientific) and washed extensively with lysis  
531 buffer with 500 mM NaCl. 6xHis-TEV-FANCI or His-3C-FANCD2 proteins were eluted by  
532 lysis buffer with 250 mM imidazole and lower NaCl for ion exchange chromatography (50  
533 mM NaCl). Anion exchange for FANCI and FANCD2 were all performed using a 5 ml  
534 HiTRAP Q HP column (GE Life Sciences) using AKTA FPLC systems and eluted with a  
535 linear gradient (50 mM Tris pH8.0, 50-1000 mM NaCl, 5 mM Dithiothreitol (DTT) and 5%  
536 v/v glycerol). The proteins were further purified using SEC using a Superose6 10/300 GL  
537 column in 20 mM Tris pH8.0, 400 mM NaCl, 5 mM DTT and 5% v/v glycerol. Proteins were  
538 concentrated using 50,000 MWCO Amicon Ultra centrifugal filters (Merck) to before flash-  
539 frozen as single-use aliquots in the same buffer system.

#### 540 **Preparation of Ub<sup>IR800</sup> material**

541 6xHis-smt3-SGCGSG-Ubiquitin material post affinity and gel-filtration chromatography was  
542 dialysed into 1x Phosphate buffered saline (PBS) pH7.4 with 0.5 mM EDTA. Protein  
543 concentration was estimates using SDS-PAGE and SimplyBlue (Invitrogen) staining using  
544 known protein standards of similar size. The dialysed material was reduced with a final  
545 concentration of 50 mM 2-Mercaptoethanol (Sigma Aldrich) for 1 hour at 37°C. The material  
546 was rapidly buffered exchanged into 1xPBS pH7.4 with 0.5 mM EDTA using 7K MWCO  
547 Zeba Spin Desalting Columns (Pierce) and immediately mixed, at 1:2 ratio, with DyLight  
548 800 Maleimide (Life Technologies) dye solubilised in neat Dimethylformamide (DMF,  
549 Pierce). All subsequent steps were protected from direct light. The labelling reaction was  
550 allowed to proceed at 25°C for 8-10h, quenched using 50 mM 2-Mercaptoethanol and excess  
551 dye removed by extensive dialyses into 1x PBS buffer using 10,000 MWCO Spectra/Por  
552 membrane (Spectrum Labs). The labelled fusion protein was cleaved using 6xHis-Ulp1  
553 protease, passed over Ni-NTA Resin (Thermo Scientific) to capture the protease and 6xHis-  
554 smt3 tag. The material was further purified using Superdex 75 10/300 GL in 50 mM Tris-HCl



555 pH7.5, 150 mM NaCl. Fractions with labelled ubiquitin were pooled and protein  
556 concentration was estimated as above.

### 557 **Multi-turnover substrate ubiquitination assays**

558 All reactions were carried out in 50 mM Tris-HCl, 100 mM NaCl, 1 mM TCEP, 2 mM  
559 MgCl<sub>2</sub> and 4% v/v glycerol buffer system at pH7.6 and 30°C. Frozen protein aliquots were  
560 thawed on ice and reactions performed within 12 h of thaw. All reaction mixtures were  
561 performed on ice. The DNA co-factors for human substrates have been previously described  
562 (Longerich et al., 2014) and the following sequences were synthesised as 1 µmole duplexes  
563 and PAGE purified (IDT technologies).

564 Sense -

565 TTGATCAGAGGTCATTTGAATTCATGGCTTCGAGCTTCATGTAGAGTCGACGGTG  
566 CTGGGATCCAACATGTTTTCAATCTG

567 Antisense -

568 CAGATTGAAAACATGTTGGATCCCAGCACCGTCGACTCTACATGAAGCTCGAAG  
569 CCATGAATTCAAATGACCTCTGATCAA

570 End-point reactions (15 µL) contained 25 nM 6xHis-Ube1, 3 µM Ub<sup>IR800</sup>, 0.1 µM Ube2T and  
571 FANCL<sup>UR</sup>, 1 µM FANCI-FANCD2 complex or FANCI alone and 2 µM dsDNA. Reaction  
572 mixes were incubated on ice for 10 min to allow for substrate-DNA complex formation  
573 followed by addition of Adenosine triphosphate (ATP) at a final concentration of 5 mM.  
574 Reactions were terminated after 30 min with an equal amount of 2xLDS sample buffer  
575 (Pierce) containing 200 mM 2- Mercaptoethanol and boiled at 98°C for 3min. Subsequently 4  
576 µL of boiled samples were resolved in 10 well Bolt 4-12% Bis-Tris Plus Gels (Invitrogen)  
577 using a 1x MOPS running buffer system (Invitrogen). Gels were resolved until the 25 kDa  
578 MW marker of All Blue Precision Plus protein standard (Bio-Rad) is at the bottom of the gel.

579 Gels were rinsed with water and scanned by direct fluorescence monitoring using Li-COR  
580 Odyssey CLX Infrared Imaging System. Time-course reactions (60  $\mu$ L) for rate  
581 determination were setup as described above except the 0 min time-point was taken prior to  
582 addition of ATP, 8  $\mu$ L sample at indicated time-points and terminated with equal amounts of  
583 2xLDS reducing sample buffer. Samples were boiled together after last time-point and 4  $\mu$ L  
584 were resolved in 17 well NuPAGE 4-12% Bis-Tris Gels (Invitrogen) as described above.  
585 Gels were scanned as before and analysed using ImageStudio software (Li-COR). A custom  
586 rectangle in 0 min lane was used for background subtraction. An identical shape area was  
587 used to quantify amount of product formed using trimmed signal intensities values. The data  
588 was exported into Microsoft Excel and plotted against time to determine rates in the linear  
589 reaction range. Finally rates were normalized to wildtype E2. Experiments were performed in  
590 triplicate and final rate graphs were plotted (Mean  $\pm$  SD) in GraphPad Prism 7.

591 PCNA ubiquitination assays (20  $\mu$ L) contained 25 nM 6xHis-Ube1, 20  $\mu$ M Ub, 2  $\mu$ M Ube2B,  
592 9  $\mu$ M 6xHisPCNA and the indicated amounts of 6xHis-smt3-Rad18. Post ATP addition (5  
593 mM), reactions were allowed to proceed for 90 min and terminated with equal amounts of  
594 2xLDS reducing sample buffer and boiled as before. Samples were diluted to 60  $\mu$ L using  
595 1xLDS reducing sample buffer. 3  $\mu$ L (PCNA blot) and 10  $\mu$ L (Ube2B and Rad18 blot) of the  
596 diluted sample was resolved in 15 well NuPAGE 4-12% Bis-Tris Gels (Invitrogen) and  
597 transferred using iBlot Western Blotting system and nitrocellulose transfer stacks  
598 (Invitrogen). Membranes were blocked using 1xPBS buffer containing 1% w/v BSA and  
599 0.05% v/v Tween20. The respective membranes were incubated overnight at 4°C with anti-  
600 PCNA mouse monoclonal antibody (ab29, Abcam) at 0.4 ng/ $\mu$ L, anti-Ube2B rabbit  
601 polyclonal (10733-1-AP, Proteintech) at 0.15 ng/ $\mu$ L and anti-Rad18 rabbit polyclonal  
602 antibody (18333-1-AP) at 0.6 ng/ $\mu$ L. Blots were washed 3x15min with 1xPBS buffer with  
603 0.05% v/v Tween20 and probed with IR800 labelled secondary antibodies (Li-COR) of the

604 corresponding species at 0.1 ng/ $\mu$ L for 2 h at room-temperature. Blots were washed 3x15min  
605 with 1xPBS buffer with 0.05% v/v Tween20 and scanned by direct fluorescence monitoring  
606 using Li-COR Odyssey CLX Infrared Imaging System. Experiments were performed in  
607 duplicate to confirm consistency of results

## 608 **E2 charging, autoubiquitination and lysine discharge assays**

609 All reactions were carried out in 50 mM Hepes, 100 mM NaCl, 1 mM TCEP, 2 mM MgCl<sub>2</sub>  
610 and 4% v/v glycerol buffer system at pH7.6 and 30°C. Ube2T charging reactions (10  $\mu$ L)  
611 contained 100 nM 6xHis-Ube1, 10  $\mu$ M E2 and Ubiquitin. Reactions were commenced by  
612 addition of buffer or ATP at a final concentration of 5 mM. Reactions were terminated after 5  
613 min with 5  $\mu$ L of non-reducing 3xLDS sample buffer. 1  $\mu$ g of Ube2T was resolved in 15 well  
614 NuPAGE 4-12% Bis-Tris Gels (Invitrogen). Gels were rinsed with water, stained with  
615 InstantBlue Coomassie stain. Gels were de-stained with water and scanned. Experiments  
616 were performed in duplicate to confirm consistency of results. Ube2T<sup>1-152</sup> auto-ubiquitination  
617 reactions (60  $\mu$ L) contained 100 nM 6xHis-Ube1, 10  $\mu$ M E2 and 20  $\mu$ M Ubiquitin. The 0  
618 time-point was taken prior to ATP addition (5 mM final), 8  $\mu$ L sample was taken at indicated  
619 time-points and terminated with 4  $\mu$ L of 3xLDS reducing sample buffer. 0.8  $\mu$ g of Ube2T<sup>1-152</sup>  
620 was resolved in 15 well NuPAGE 12% Bis-Tris Gels (Invitrogen), stained and de-stained as  
621 before. Experiments were performed in triplicate to confirm consistency of results. For lysine  
622 discharge assays, charging reactions (50  $\mu$ L) contained 120 nM 6xHis-Ube1, 12  $\mu$ M E2 and  
623 24  $\mu$ M Ubiquitin and started with ATP (5 mM final). After 10 min at 30°C, 0.5 U of Apyrase  
624 (NEB) was added to arrest the reaction and left at room temperature for 3 min. The chase was  
625 initiated by adding 10 mM L-Lysine (Sigma Aldrich) to bring the final volume to 60  $\mu$ L.  
626 Initial time-point sample (8  $\mu$ L) was taken at 0.1 min and subsequent samples were taken at  
627 indicated time-points. Samples were terminated with 4  $\mu$ L of 3xLDS non-reducing sample  
628 buffer. 0.9  $\mu$ g of Ube2T<sup>1-152</sup> was resolved in 15 well NuPAGE 12% Bis-Tris Gels

629 (Invitrogen), stained and de-stained as before. Gels were scanned by direct fluorescence  
630 monitoring (700 nm  $\lambda$ ) using Li-COR Odyssey CLX Infrared Imaging System. The  
631 intensities of product formed (E2 released) was obtained and converted protein amount  
632 (picomoles) using an E2 only serial dilution reference gel that was stained and de-stained in  
633 parallel. Absolute rates were determined by plotting product versus time in Microsoft Excel.  
634 Experiments were performed in duplicate and final rate graphs were plotted (Mean  $\pm$  SD) in  
635 GraphPad Prism 7.

### 636 **Single-turnover substrate ubiquitination assays**

637 All reactions were carried out in 50 mM Tris-HCl, 100 mM NaCl, 1 mM TCEP, 2 mM  
638 MgCl<sub>2</sub> and 4% v/v glycerol buffer system at pH7.6. Charging reactions (30  $\mu$ L) contained 10  
639 nM 6xHis-Ube1, 10  $\mu$ M E2 and 10  $\mu$ M Ub<sup>IR800</sup> and started with ATP (5 mM final). After 10  
640 min at 30°C, 0.25 U of Apyrase was added to arrest the reaction and left at room temperature  
641 for 3 min. E2 charging efficiency was determined to be ~80%. Chase mixes (40  $\mu$ L)  
642 containing 2  $\mu$ M FANCI<sup>K523R</sup>-FANCD2-dsDNA complex, 0.2  $\mu$ M E2~Ub<sup>IR800</sup> and indicated  
643 amounts of FANCL<sup>UR</sup> were incubated at 30°C. After 10 min, 5  $\mu$ L of the reaction diluted 1-  
644 fold and terminated with 10  $\mu$ L of 2xLDS non-reducing or reducing sample buffer. Samples  
645 with reducing agent were boiled at 98°C for 3min. 4  $\mu$ L of each sample were resolved in 10  
646 well Bolt 4-12% Bis-Tris Plus Gels (Invitrogen) until the 25 kDa MW marker is at the bottom  
647 of the gel. Gels were rinsed with water and scanned by direct fluorescence monitoring using  
648 Li-COR Odyssey CLX Infrared Imaging System.

### 649 **Isothermal titration calorimetry**

650 ITC experiments were performed using MicroCal PEAQ-ITC (Malvern instruments). All  
651 experiments were performed at 20°C, in duplicate, using freshly prepared proteins within 2  
652 days of the last purification step. Proteins were buffer exchanged using 7K MWCO Zeba

653 Spin Desalting Columns (Pierce) into 100 mM Tris-HCl, 100 mM NaCl, 0.4 mM TCEP  
654 buffer at pH 8.0 that was filtered and thoroughly degassed. FANCL<sup>UR</sup> (ranging 22 to 34  $\mu$ M)  
655 and FANCL<sup>R</sup> (~32  $\mu$ M) was held in the cell, while Ube2T (ranging 400 to 600  $\mu$ M) was  
656 present in the syringe. A total of 16 injections were carried out with the first injection of 0.3  
657  $\mu$ L over 0.6s followed by 15 injections of 1.5  $\mu$ L over 3s. All injections were spaced by 120s  
658 with mix speed set at 500 rotations per minute. Each experiment was controlled by an  
659 identical E2 into buffer run to account for the heat of dilution. All data were fitted using a  
660 single-site binding model using MicroCal PEAQ-ITC analysis software.

### 661 **Residue Network Analysis**

662 Residue Interaction Networks (RINs) were generated using the RIN generator webserver  
663 (<http://protein.bio.unipd.it/ring/>)(Piovesan et al., 2016). For this study, networks were  
664 generated for consecutive residues in individual chains using relaxed distance thresholds.  
665 Further, all atoms of a likely residue pair were considered when applying distance thresholds  
666 and subsequently all possible interactions outputted. Finally, water molecules and hetero  
667 atoms/ligands were omitted for the RIN. The output files were uploaded in Cytoscape  
668 (Shannon et al., 2003), and the RINs were compared using the RINalyzer app (Doncheva et  
669 al., 2011) using residue IDs as matching attribute. In case of Ube2T, two copies of the RING  
670 bound state were first individually compared to unbound state using a difference edge weight.  
671 The resulting RIN comparison matrices were merged into a collective network using the  
672 inbuilt merge network tool on Cytoscape.

673

### 674 **Author contributions**

675 V.K.C. – Conceptualization, Methodology, Validation, Formal Analysis, Investigation,  
676 Resources, Writing - original draft preparation, review and editing, Visualization, Project  
677 Administration.

678 C.A. – Methodology, Validation, Resources, Writing - review.

679 R.T. – Resources.

680 H.W. – Conceptualization, Writing - review and editing, Supervision, Project Administration,  
681 Funding Acquisition

682

### 683 **Acknowledgements**

684 This work was supported by the Medical Research Council (MRC grant number  
685 MC\_UU\_12016/12); the EMBO Young Investigator Programme to H.W.; the European  
686 Research Council (ERC-2015-CoG-681582 ICLUb consolidator grant to H.W. The pLou3  
687 Rat RNF4 RING-RING DNA construct was a kind gift from Prof. Ron Hay, University of  
688 Dundee. The human PCNA cDNA template, was a kind gift from Dr Svend Petersen-Mahrt,  
689 European Institute of Oncology, Milan. The Human 6xHis-Ube1 protein material was a kind  
690 gift from Dr. Axel Knebel, MRC Protein Phosphorylation and Ubiquitylation Unit. All  
691 constructs are available on request from the MRC Protein Phosphorylation and  
692 Ubiquitylation Unit reagents Web page (<http://mrcppureagents.dundee.ac.uk>) or from the  
693 corresponding author.

694

### 695 **Conflict of interest**

696 Authors declare no conflict of interest.

697

## 698 **References**

- 699 Al-Hakim, A., Escribano-Diaz, C., Landry, M.C., O'Donnell, L., Panier, S., Szilard, R.K., and Durocher, D.  
700 (2010). The ubiquitous role of ubiquitin in the DNA damage response. *DNA Repair (Amst)* 9, 1229-1240.
- 701 Alpi, A.F., Pace, P.E., Babu, M.M., and Patel, K.J. (2008). Mechanistic insight into site-restricted  
702 monoubiquitination of FANCD2 by Ube2t, FANCL, and FANCI. *Mol Cell* 32, 767-777.
- 703 Alpi, A.F., and Patel, K.J. (2009). Monoubiquitylation in the Fanconi anemia DNA damage response pathway.  
704 *DNA Repair (Amst)* 8, 430-435.
- 705 Benirschke, R.C., Thompson, J.R., Nomine, Y., Wasielewski, E., Juranic, N., Macura, S., Hatakeyama, S.,  
706 Nakayama, K.I., Botuyan, M.V., and Mer, G. (2010). Molecular basis for the association of human E4B U box  
707 ubiquitin ligase with E2-conjugating enzymes UbcH5c and Ubc4. *Structure* 18, 955-965.
- 708 Bentley, M.L., Corn, J.E., Dong, K.C., Phung, Q., Cheung, T.K., and Cochran, A.G. (2011). Recognition of  
709 UbcH5c and the nucleosome by the Bmi1/Ring1b ubiquitin ligase complex. *EMBO J* 30, 3285-3297.
- 710 Branigan, E., Plechanovova, A., Jaffray, E.G., Naismith, J.H., and Hay, R.T. (2015). Structural basis for the  
711 RING-catalyzed synthesis of K63-linked ubiquitin chains. *Nat Struct Mol Biol* 22, 597-602.
- 712 Brown, N.G., VanderLinden, R., Watson, E.R., Qiao, R., Grace, C.R., Yamaguchi, M., Weissmann, F., Frye,  
713 J.J., Dube, P., Ei Cho, S., *et al.* (2015). RING E3 mechanism for ubiquitin ligation to a disordered substrate  
714 visualized for human anaphase-promoting complex. *Proc Natl Acad Sci U S A* 112, 5272-5279.
- 715 Brown, N.G., Watson, E.R., Weissmann, F., Jarvis, M.A., VanderLinden, R., Grace, C.R., Frye, J.J., Qiao, R.,  
716 Dube, P., Petzold, G., *et al.* (2014). Mechanism of polyubiquitination by human anaphase-promoting complex:  
717 RING repurposing for ubiquitin chain assembly. *Mol Cell* 56, 246-260.
- 718 Ceccaldi, R., Sarangi, P., and D'Andrea, A.D. (2016). The Fanconi anaemia pathway: new players and new  
719 functions. *Nat Rev Mol Cell Biol* 17, 337-349.
- 720 Chakrabarti, K.S., Li, J., Das, R., and Byrd, R.A. (2017). Conformational Dynamics and Allostery in E2:E3  
721 Interactions Drive Ubiquitination: gp78 and Ube2g2. *Structure* 25, 794-805 e795.
- 722 Cole, A.R., Lewis, L.P., and Walden, H. (2010). The structure of the catalytic subunit FANCL of the Fanconi  
723 anemia core complex. *Nat Struct Mol Biol* 17, 294-298.
- 724 Das, R., Liang, Y.H., Mariano, J., Li, J., Huang, T., King, A., Tarasov, S.G., Weissman, A.M., Ji, X., and Byrd,  
725 R.A. (2013). Allosteric regulation of E2:E3 interactions promote a processive ubiquitination machine. *EMBO J*  
726 32, 2504-2516.
- 727 Das, R., Mariano, J., Tsai, Y.C., Kalathur, R.C., Kostova, Z., Li, J., Tarasov, S.G., McFeeters, R.L., Altieri,  
728 A.S., Ji, X., *et al.* (2009). Allosteric activation of E2-RING finger-mediated ubiquitylation by a structurally  
729 defined specific E2-binding region of gp78. *Mol Cell* 34, 674-685.
- 730 Doncheva, N.T., Klein, K., Domingues, F.S., and Albrecht, M. (2011). Analyzing and visualizing residue  
731 networks of protein structures. *Trends Biochem Sci* 36, 179-182.
- 732 Dou, H., Buetow, L., Sibbet, G.J., Cameron, K., and Huang, D.T. (2012). BIRC7-E2 ubiquitin conjugate  
733 structure reveals the mechanism of ubiquitin transfer by a RING dimer. *Nat Struct Mol Biol* 19, 876-883.
- 734 Eddins, M.J., Carlile, C.M., Gomez, K.M., Pickart, C.M., and Wolberger, C. (2006). Mms2-Ubc13 covalently  
735 bound to ubiquitin reveals the structural basis of linkage-specific polyubiquitin chain formation. *Nat Struct Mol*  
736 *Biol* 13, 915-920.
- 737 Ernst, A., Avvakumov, G., Tong, J., Fan, Y., Zhao, Y., Alberts, P., Persaud, A., Walker, J.R., Neculai, A.M.,  
738 Neculai, D., *et al.* (2013). A strategy for modulation of enzymes in the ubiquitin system. *Science* 339, 590-595.
- 739 Freemont, P.S. (2000). RING for destruction? *Curr Biol* 10, R84-87.
- 740 Gabrielsen, M., Buetow, L., Nakasone, M.A., Ahmed, S.F., Sibbet, G.J., Smith, B.O., Zhang, W., Sidhu, S.S.,  
741 and Huang, D.T. (2017). A General Strategy for Discovery of Inhibitors and Activators of RING and U-box E3  
742 Ligases with Ubiquitin Variants. *Mol Cell* 68, 456-470 e410.
- 743 Gallego, L.D., Ghodgaonkar Steger, M., Polyansky, A.A., Schubert, T., Zagrovic, B., Zheng, N., Clausen, T.,  
744 Herzog, F., and Kohler, A. (2016). Structural mechanism for the recognition and ubiquitination of a single  
745 nucleosome residue by Rad6-Bre1. *Proc Natl Acad Sci U S A* 113, 10553-10558.
- 746 Garaycochea, J.I., and Patel, K.J. (2014). Why does the bone marrow fail in Fanconi anemia? *Blood* 123, 26-  
747 34.
- 748 Garcia-Higuera, I., Taniguchi, T., Ganesan, S., Meyn, M.S., Timmers, C., Hejna, J., Grompe, M., and D'Andrea,  
749 A.D. (2001). Interaction of the Fanconi anemia proteins and BRCA1 in a common pathway. *Mol Cell* 7, 249-  
750 262.

751 Hewitt, W.M., Lountos, G.T., Zlotkowski, K., Dahlhauser, S.D., Saunders, L.B., Needle, D., Tropea, J.E., Zhan,  
752 C., Wei, G., Ma, B., *et al.* (2016). Insights Into the Allosteric Inhibition of the SUMO E2 Enzyme Ubc9. *Angew*  
753 *Chem Int Ed Engl* *55*, 5703-5707.

754 Hibbert, R.G., Huang, A., Boelens, R., and Sixma, T.K. (2011). E3 ligase Rad18 promotes monoubiquitination  
755 rather than ubiquitin chain formation by E2 enzyme Rad6. *Proc Natl Acad Sci U S A* *108*, 5590-5595.

756 Hira, A., Yoshida, K., Sato, K., Okuno, Y., Shiraishi, Y., Chiba, K., Tanaka, H., Miyano, S., Shimamoto, A.,  
757 Tahara, H., *et al.* (2015). Mutations in the gene encoding the E2 conjugating enzyme UBE2T cause Fanconi  
758 anemia. *Am J Hum Genet* *96*, 1001-1007.

759 Hochstrasser, M. (2009). Origin and function of ubiquitin-like proteins. *Nature* *458*, 422-429.

760 Hodson, C., Cole, A.R., Lewis, L.P., Miles, J.A., Purkiss, A., and Walden, H. (2011). Structural analysis of  
761 human FANCL, the E3 ligase in the Fanconi anemia pathway. *J Biol Chem* *286*, 32628-32637.

762 Hodson, C., Purkiss, A., Miles, J.A., and Walden, H. (2014). Structure of the human FANCL RING-Ube2T  
763 complex reveals determinants of cognate E3-E2 selection. *Structure* *22*, 337-344.

764 Huang, A., Hibbert, R.G., de Jong, R.N., Das, D., Sixma, T.K., and Boelens, R. (2011). Symmetry and  
765 asymmetry of the RING-RING dimer of Rad18. *J Mol Biol* *410*, 424-435.

766 Joo, W., Xu, G., Persky, N.S., Smogorzewska, A., Rudge, D.G., Buzovetsky, O., Elledge, S.J., and Pavletich,  
767 N.P. (2011). Structure of the FANCI-FANCD2 complex: insights into the Fanconi anemia DNA repair pathway.  
768 *Science* *333*, 312-316.

769 Kelly, A., Wickliffe, K.E., Song, L., Fedrigo, I., and Rape, M. (2014). Ubiquitin chain elongation requires E3-  
770 dependent tracking of the emerging conjugate. *Mol Cell* *56*, 232-245.

771 Kim, W., Bennett, E.J., Huttlin, E.L., Guo, A., Li, J., Possemato, A., Sowa, M.E., Rad, R., Rush, J., Comb, M.J.,  
772 *et al.* (2011). Systematic and quantitative assessment of the ubiquitin-modified proteome. *Mol Cell* *44*, 325-340.

773 Kottemann, M.C., and Smogorzewska, A. (2013). Fanconi anaemia and the repair of Watson and Crick DNA  
774 crosslinks. *Nature* *493*, 356-363.

775 Kulathu, Y., and Komander, D. (2012). Atypical ubiquitylation - the unexplored world of polyubiquitin beyond  
776 Lys48 and Lys63 linkages. *Nat Rev Mol Cell Biol* *13*, 508-523.

777 Li, S., Liang, Y.H., Mariano, J., Metzger, M.B., Stringer, D.K., Hristova, V.A., Li, J., Randazzo, P.A., Tsai,  
778 Y.C., Ji, X., *et al.* (2015). Insights into Ubiquitination from the Unique Clamp-like Binding of the RING E3  
779 AO7 to the E2 UbcH5B. *J Biol Chem* *290*, 30225-30239.

780 Li, W., Tu, D., Li, L., Wollert, T., Ghirlando, R., Brunger, A.T., and Ye, Y. (2009). Mechanistic insights into  
781 active site-associated polyubiquitination by the ubiquitin-conjugating enzyme Ube2g2. *Proc Natl Acad Sci U S*  
782 *A* *106*, 3722-3727.

783 Liang, C.C., Li, Z., Lopez-Martinez, D., Nicholson, W.V., Venien-Bryan, C., and Cohn, M.A. (2016). The  
784 FANCD2-FANCI complex is recruited to DNA interstrand crosslinks before monoubiquitination of FANCD2.  
785 *Nat Commun* *7*, 12124.

786 Liu, W., Shang, Y., Zeng, Y., Liu, C., Li, Y., Zhai, L., Wang, P., Lou, J., Xu, P., Ye, Y., *et al.* (2014). Dimeric  
787 Ube2g2 simultaneously engages donor and acceptor ubiquitins to form Lys48-linked ubiquitin chains. *EMBO J*  
788 *33*, 46-61.

789 Longerich, S., Kwon, Y., Tsai, M.S., Hlaing, A.S., Kupfer, G.M., and Sung, P. (2014). Regulation of FANCD2  
790 and FANCI monoubiquitination by their interaction and by DNA. *Nucleic Acids Res* *42*, 5657-5670.

791 Machida, Y.J., Machida, Y., Chen, Y., Gurtan, A.M., Kupfer, G.M., D'Andrea, A.D., and Dutta, A. (2006).  
792 UBE2T is the E2 in the Fanconi anemia pathway and undergoes negative autoregulation. *Mol Cell* *23*, 589-596.

793 Mattioli, F., Uckelmann, M., Sahtoe, D.D., van Dijk, W.J., and Sixma, T.K. (2014). The nucleosome acidic  
794 patch plays a critical role in RNF168-dependent ubiquitination of histone H2A. *Nat Commun* *5*, 3291.

795 Mattioli, F., Vissers, J.H., van Dijk, W.J., Ikpa, P., Citterio, E., Vermeulen, W., Martejn, J.A., and Sixma, T.K.  
796 (2012). RNF168 ubiquitinates K13-15 on H2A/H2AX to drive DNA damage signaling. *Cell* *150*, 1182-1195.

797 McGinty, R.K., Henrici, R.C., and Tan, S. (2014). Crystal structure of the PRC1 ubiquitylation module bound to  
798 the nucleosome. *Nature* *514*, 591-596.

799 Meetei, A.R., de Winter, J.P., Medhurst, A.L., Wallisch, M., Waisfisz, Q., van de Vrugt, H.J., Oostra, A.B.,  
800 Yan, Z., Ling, C., Bishop, C.E., *et al.* (2003). A novel ubiquitin ligase is deficient in Fanconi anemia. *Nat Genet*  
801 *35*, 165-170.

802 Metzger, M.B., Liang, Y.H., Das, R., Mariano, J., Li, S., Li, J., Kostova, Z., Byrd, R.A., Ji, X., and Weissman,  
803 A.M. (2013). A structurally unique E2-binding domain activates ubiquitination by the ERAD E2, Ubc7p,  
804 through multiple mechanisms. *Mol Cell* *50*, 516-527.

805 Metzger, M.B., Pruneda, J.N., Klevit, R.E., and Weissman, A.M. (2014). RING-type E3 ligases: master  
806 manipulators of E2 ubiquitin-conjugating enzymes and ubiquitination. *Biochim Biophys Acta* *1843*, 47-60.

807 Middleton, A.J., and Day, C.L. (2015). The molecular basis of lysine 48 ubiquitin chain synthesis by Ube2K.  
808 *Sci Rep* *5*, 16793.



809 Morreale, F.E., Bortoluzzi, A., Chaugule, V.K., Arkinson, C., Walden, H., and Ciulli, A. (2017). Allosteric  
810 Targeting of the Fanconi Anemia Ubiquitin-Conjugating Enzyme Ube2T by Fragment Screening. *J Med Chem*  
811 *60*, 4093-4098.  
812 Nijman, S.M., Huang, T.T., Dirac, A.M., Brummelkamp, T.R., Kerkhoven, R.M., D'Andrea, A.D., and  
813 Bernards, R. (2005). The deubiquitinating enzyme USP1 regulates the Fanconi anemia pathway. *Mol Cell* *17*,  
814 331-339.  
815 Ozkan, E., Yu, H., and Deisenhofer, J. (2005). Mechanistic insight into the allosteric activation of a ubiquitin-  
816 conjugating enzyme by RING-type ubiquitin ligases. *Proc Natl Acad Sci U S A* *102*, 18890-18895.  
817 Petroski, M.D., and Deshaies, R.J. (2005). Mechanism of lysine 48-linked ubiquitin-chain synthesis by the  
818 cullin-RING ubiquitin-ligase complex SCF-Cdc34. *Cell* *123*, 1107-1120.  
819 Pickart, C.M. (2001). Mechanisms underlying ubiquitination. *Annu Rev Biochem* *70*, 503-533.  
820 Piovesan, D., Minervini, G., and Tosatto, S.C. (2016). The RING 2.0 web server for high quality residue  
821 interaction networks. *Nucleic Acids Res* *44*, W367-374.  
822 Plechanovova, A., Jaffray, E.G., McMahon, S.A., Johnson, K.A., Navratilova, I., Naismith, J.H., and Hay, R.T.  
823 (2011). Mechanism of ubiquitylation by dimeric RING ligase RNF4. *Nat Struct Mol Biol* *18*, 1052-1059.  
824 Plechanovova, A., Jaffray, E.G., Tatham, M.H., Naismith, J.H., and Hay, R.T. (2012). Structure of a RING E3  
825 ligase and ubiquitin-loaded E2 primed for catalysis. *Nature* *489*, 115-120.  
826 Pruneda, J.N., Littlefield, P.J., Soss, S.E., Nordquist, K.A., Chazin, W.J., Brzovic, P.S., and Klevit, R.E. (2012).  
827 Structure of an E3:E2~Ub complex reveals an allosteric mechanism shared among RING/U-box ligases. *Mol*  
828 *Cell* *47*, 933-942.  
829 Rajendra, E., Oestergaard, V.H., Langevin, F., Wang, M., Dornan, G.L., Patel, K.J., and Passmore, L.A. (2014).  
830 The genetic and biochemical basis of FANCD2 monoubiquitination. *Mol Cell* *54*, 858-869.  
831 Rickman, K.A., Lach, F.P., Abhyankar, A., Donovan, F.X., Sanborn, E.M., Kennedy, J.A., Sougnez, C.,  
832 Gabriel, S.B., Elemento, O., Chandrasekharappa, S.C., *et al.* (2015). Deficiency of UBE2T, the E2 Ubiquitin  
833 Ligase Necessary for FANCD2 and FANCI Ubiquitination, Causes FA-T Subtype of Fanconi Anemia. *Cell Rep*  
834 *12*, 35-41.  
835 Rodrigo-Brenni, M.C., Foster, S.A., and Morgan, D.O. (2010). Catalysis of lysine 48-specific ubiquitin chain  
836 assembly by residues in E2 and ubiquitin. *Mol Cell* *39*, 548-559.  
837 Rodrigo-Brenni, M.C., and Morgan, D.O. (2007). Sequential E2s drive polyubiquitin chain assembly on APC  
838 targets. *Cell* *130*, 127-139.  
839 Saha, A., Lewis, S., Kleiger, G., Kuhlman, B., and Deshaies, R.J. (2011). Essential role for ubiquitin-ubiquitin-  
840 conjugating enzyme interaction in ubiquitin discharge from Cdc34 to substrate. *Mol Cell* *42*, 75-83.  
841 Sareen, A., Chaudhury, I., Adams, N., and Sobek, A. (2012). Fanconi anemia proteins FANCD2 and FANCI  
842 exhibit different DNA damage responses during S-phase. *Nucleic Acids Res* *40*, 8425-8439.  
843 Sato, K., Toda, K., Ishiai, M., Takata, M., and Kurumizaka, H. (2012). DNA robustly stimulates FANCD2  
844 monoubiquitylation in the complex with FANCI. *Nucleic Acids Res* *40*, 4553-4561.  
845 Shannon, P., Markiel, A., Ozier, O., Baliga, N.S., Wang, J.T., Ramage, D., Amin, N., Schwikowski, B., and  
846 Ideker, T. (2003). Cytoscape: a software environment for integrated models of biomolecular interaction  
847 networks. *Genome Res* *13*, 2498-2504.  
848 Sheng, Y., Hong, J.H., Doherty, R., Srikumar, T., Shloush, J., Avvakumov, G.V., Walker, J.R., Xue, S.,  
849 Neculai, D., Wan, J.W., *et al.* (2012). A human ubiquitin conjugating enzyme (E2)-HECT E3 ligase structure-  
850 function screen. *Mol Cell Proteomics* *11*, 329-341.  
851 Sims, A.E., Spiteri, E., Sims, R.J., 3rd, Arita, A.G., Lach, F.P., Landers, T., Wurm, M., Freund, M., Neveling,  
852 K., Hanenberg, H., *et al.* (2007). FANCI is a second monoubiquitinated member of the Fanconi anemia  
853 pathway. *Nat Struct Mol Biol* *14*, 564-567.  
854 Smogorzewska, A., Matsuoka, S., Vinciguerra, P., McDonald, E.R., 3rd, Hurov, K.E., Luo, J., Ballif, B.A.,  
855 Gygi, S.P., Hofmann, K., D'Andrea, A.D., *et al.* (2007). Identification of the FANCI protein, a  
856 monoubiquitinated FANCD2 paralog required for DNA repair. *Cell* *129*, 289-301.  
857 Stewart, M.D., Ritterhoff, T., Klevit, R.E., and Brzovic, P.S. (2016). E2 enzymes: more than just middle men.  
858 *Cell Res* *26*, 423-440.  
859 Sugahara, R., Mon, H., Lee, J.M., and Kusakabe, T. (2012). Monoubiquitination-dependent chromatin loading  
860 of FancD2 in silkworms, a species lacking the FA core complex. *Gene* *501*, 180-187.  
861 Swuec, P., Renault, L., Borg, A., Shah, F., Murphy, V.J., van Twest, S., Snijders, A.P., Deans, A.J., and Costa,  
862 A. (2017). The FA Core Complex Contains a Homo-dimeric Catalytic Module for the Symmetric Mono-  
863 ubiquitination of FANCI-FANCD2. *Cell Rep* *18*, 611-623.  
864 Turco, E., Gallego, L.D., Schneider, M., and Kohler, A. (2015). Monoubiquitination of histone H2B is intrinsic  
865 to the Bre1 RING domain-Rad6 interaction and augmented by a second Rad6-binding site on Bre1. *J Biol Chem*  
866 *290*, 5298-5310.  
867 Uckelmann, M., and Sixma, T.K. (2017). Histone ubiquitination in the DNA damage response. *DNA Repair*  
868 (Amst) *56*, 92-101.

869 Udeshi, N.D., Svinkina, T., Mertins, P., Kuhn, E., Mani, D.R., Qiao, J.W., and Carr, S.A. (2013). Refined  
 870 preparation and use of anti-diglycine remnant (K-epsilon-GG) antibody enables routine quantification of  
 871 10,000s of ubiquitination sites in single proteomics experiments. *Mol Cell Proteomics* 12, 825-831.  
 872 Ulrich, H.D., and Walden, H. (2010). Ubiquitin signalling in DNA replication and repair. *Nat Rev Mol Cell Biol*  
 873 11, 479-489.  
 874 Valimberti, I., Tiberti, M., Lambrugh, M., Sarcevic, B., and Papaleo, E. (2015). E2 superfamily of ubiquitin-  
 875 conjugating enzymes: constitutively active or activated through phosphorylation in the catalytic cleft. *Sci Rep* 5,  
 876 14849.  
 877 van den Ent, F., and Lowe, J. (2006). RF cloning: a restriction-free method for inserting target genes into  
 878 plasmids. *J Biochem Biophys Methods* 67, 67-74.  
 879 van Twest, S., Murphy, V.J., Hodson, C., Tan, W., Swuec, P., O'Rourke, J.J., Heierhorst, J., Crismani, W., and  
 880 Deans, A.J. (2017). Mechanism of Ubiquitination and Deubiquitination in the Fanconi Anemia Pathway. *Mol*  
 881 *Cell* 65, 247-259.  
 882 Virts, E.L., Jankowska, A., Mackay, C., Glaas, M.F., Wiek, C., Kelich, S.L., Lottmann, N., Kennedy, F.M.,  
 883 Marchal, C., Lehnert, E., *et al.* (2015). AluY-mediated germline deletion, duplication and somatic stem cell  
 884 reversion in UBE2T defines a new subtype of Fanconi anemia. *Hum Mol Genet* 24, 5093-5108.  
 885 Walden, H., and Deans, A.J. (2014). The Fanconi anemia DNA repair pathway: structural and functional  
 886 insights into a complex disorder. *Annu Rev Biophys* 43, 257-278.  
 887 Wickliffe, K.E., Lorenz, S., Wemmer, D.E., Kuriyan, J., and Rape, M. (2011). The mechanism of linkage-  
 888 specific ubiquitin chain elongation by a single-subunit E2. *Cell* 144, 769-781.  
 889 Windheim, M., Pegg, M., and Cohen, P. (2008). Two different classes of E2 ubiquitin-conjugating enzymes  
 890 are required for the mono-ubiquitination of proteins and elongation by polyubiquitin chains with a specific  
 891 topology. *Biochem J* 409, 723-729.  
 892 Yunus, A.A., and Lima, C.D. (2006). Lysine activation and functional analysis of E2-mediated conjugation in  
 893 the SUMO pathway. *Nat Struct Mol Biol* 13, 491-499.  
 894 Zhang, W., Wu, K.P., Sartori, M.A., Kamadurai, H.B., Ordureau, A., Jiang, C., Mercredi, P.Y., Murchie, R.,  
 895 Hu, J., Persaud, A., *et al.* (2016). System-Wide Modulation of HECT E3 Ligases with Selective Ubiquitin  
 896 Variant Probes. *Mol Cell* 62, 121-136.  
 897 Zhang, X.Y., Langenick, J., Traynor, D., Babu, M.M., Kay, R.R., and Patel, K.J. (2009). Xpf and not the  
 898 Fanconi anaemia proteins or Rev3 accounts for the extreme resistance to cisplatin in Dictyostelium discoideum.  
 899 *PLoS Genet* 5, e1000645.

900

**Table 1. Thermodynamic properties FANCL - Ube2T interaction<sup>1</sup>**

| E3                  | E2               | $K_d$ (nM)  | N    | $\Delta H$<br>(kcal.mol <sup>-1</sup> ) | $\Delta G$<br>(kcal.mol <sup>-1</sup> ) | $-T\Delta S$<br>(kcal.mol <sup>-1</sup> ) |
|---------------------|------------------|-------------|------|-----------------------------------------|-----------------------------------------|-------------------------------------------|
| FANCL <sup>UR</sup> | Wildtype         | 116.5 ± 2.6 | 0.98 | 6.46 ± 0.07                             | - 9.30                                  | -15.75 ± 0.05                             |
|                     | D32A, D33A, L92A | 121.5 ± 2.9 | 0.94 | -1.65 ± 0.16                            | - 9.28                                  | - 7.64 ± 0.17                             |
|                     | T23R, W25Q       | 200.0 ± 2.7 | 1.00 | 3.90 ± 0.70                             | - 8.99                                  | -12.55 ± 0.15                             |
|                     | E54R             | 119.5 ± 2.2 | 0.93 | 5.60 ± 0.50                             | - 9.29                                  | -14.90 ± 0.10                             |
| FANCL <sup>R</sup>  | Wildtype         | 249.5 ± 7.5 | 1.05 | 3.83 ± 0.36                             | - 8.86                                  | - 12.70 ± 0.40                            |
|                     | D32A, D33A, L92A | 251.5 ± 1.5 | 0.95 | - 2.88 ± 0.02                           | - 8.86                                  | - 5.98 ± 0.03                             |
|                     | T23R, W25Q       | 259.0 ± 8.4 | 1.05 | 3.89 ± 0.05                             | - 8.84                                  | - 12.75 ± 0.05                            |

901 <sup>1</sup>Average values from two experiments

902 **Supplementary Table 1.** Edge profile of Ube2T allosteric network model depicted in Figure  
903 4a.

904 **Supplementary Dataset S1.** Merged Ube2T intra-residue network.

905 **Supplementary Dataset S2.** Merged Ube2B intra-residue network.

906

## 907 **Figure Legends**

908 **Figure 1. FANCL<sup>UR</sup> mediated FANCD2 ubiquitination does not require the ubiquitin**  
909 **Ile44-patch.**

910 A Time-course multi-turnover ubiquitination assays with fluorescently labelled ubiquitin  
911 (Ub<sup>IR800</sup>) showing FANCL<sup>UR</sup> (0.1  $\mu$ M) and Ube2T (0.1  $\mu$ M) mediated site-specific  
912 mono-ubiquitination of Lys561 FANCD2 (1.0  $\mu$ M) when present as a FANCD2-  
913 FANCI-dsDNA (1:1:2  $\mu$ M) complex.

914 B Titration of FANCL<sup>UR</sup> - Ube2T enzymes on FANCD2-FANCI-dsDNA (1:1:2  $\mu$ M)  
915 complexes with single target lysine i.e. Lys561 FANCD2 or Lys523 FANCI reveals  
916 FANCI site can be targeted but FANCD2 site is preferred.

917 C Time-course multi-turnover ubiquitination assays with fluorescently labelled ubiquitin  
918 (Ub<sup>IR800</sup>) showing FANCL<sup>UR</sup> (0.1  $\mu$ M) and Ube2T (0.1  $\mu$ M) mediated site-specific  
919 mono-ubiquitination of Lys523 FANCI (1.0  $\mu$ M) when present as a FANCI-dsDNA  
920 (1:2  $\mu$ M) complex.

921 D Comparing FANCD2-FANCI-dsDNA (1:1:2  $\mu$ M) ubiquitination activities of the  
922 FANCL<sup>UR</sup> (0.1  $\mu$ M) - Ube2T (0.1  $\mu$ M) pair with RNF4<sup>RING-RING</sup> (0.1  $\mu$ M) - Ube2D3  
923 (0.2  $\mu$ M) pair using fluorescently labelled wildtype and Ile44Ala ubiquitin. RNF4<sup>RING-</sup>  
924 <sup>RING</sup> and Ube2D3 robustly ubiquitinates FANCI-FANCD2 using wildtype ubiquitin,  
925 but is dramatically impaired by the Ile44Ala mutant while the FANCL<sup>UR</sup> and Ube2T

926 maintain activity and site-specificity even with the ubiquitin mutant. Substrate  
927 ubiquitination is analysed by direct fluorescence monitoring (Li-COR Odyssey CLX).

928 **Figure 2. FANCL induced dynamics of Ube2T loop2 and loop7 is required for substrate**  
929 **ubiquitination.**

930 A Superpose of FANCL<sup>R</sup> (teal surface) bound copies of Ube2T (olive ribbon, PDB ID  
931 4ccg.A and brown ribbon, PDB ID 4ccg.B) with the unbound Ube2T (grey ribbon)  
932 structure (PDB ID 1yh2) showing little overall structural change. Close-up of helix1-  
933 loop2 region (top) and loop7-loop8 region (bottom) reveal local changes. Molecular  
934 figures prepared in PyMOL (Schrödinger, LLC).

935 B End-point (30 min) multi-turnover ubiquitination assay with fluorescently labelled  
936 ubiquitin (Ub<sup>IR800</sup>) show conserved residues in Ube2T helix1, loop2 and loop7 are  
937 required for FANCL<sup>UR</sup> mediated FANCD2 and FANCI ubiquitination. Substrate  
938 ubiquitination is analysed by direct fluorescence monitoring (Li-COR Odyssey CLX).

939 C Effect of Ube2T helix1, loop2 and loop7 mutants on rates of FANCD2 and FANCI  
940 ubiquitination. A loop2-loop7 hybrid mutant (Asp32Ala, Asp33Ala, Leu92Ala)  
941 shows 75% loss in substrate ubiquitination rates. Rates normalized to wildtype levels  
942 and plotted as mean ± SD (n=3).

943 D FANCL independent Ube2T<sup>1-152</sup> autoubiquitination assay shows no effect of the  
944 loop2-loop7 hybrid mutant in Lys91 autoubiquitination.

945 E Single-turnover ubiquitination assay (10 min) of a FANCD2-FANCI<sup>K523R</sup>-dsDNA  
946 (2:2:2 μM) complex with increasing amounts of FANCL<sup>UR</sup> and 200 nM of Ube2T<sup>1-152</sup>,  
947 K91R ~ Ub<sup>IR800</sup> thioester or Ube2T<sup>1-152, K91R</sup> loop2-loop7 hybrid mutant ~ Ub<sup>IR800</sup>  
948 thioester shows the latter is defective in modifying Lys561 FANCD2.

949 F Thermodynamics of FANCL<sup>UR</sup> interaction with Ube2T wildtype (left) and Ube2T  
950 loop2-loop7 hybrid mutant (middle) shows no change in binding affinity but

951 divergent binding enthalpy. The cost of favourable enthalpy for the mutant is offset by  
952 reduced conformational entropy thus contributing to reduced activity. Graphs (right)  
953 plotted as mean  $\pm$  range (n=2).

954 **Figure 3. Novel role of Ube2T backside in FANCL mediated substrate ubiquitination.**

955 A Superpose of FANCL<sup>R</sup> (teal surface) bound copy of Ube2T (olive ribbon, PDB ID  
956 4ccg.A) with unbound Ube2T (grey ribbon) structure (PDB ID 1yh2) showing  
957 residues on E2 backside ( $\beta$ 1 and  $\beta$ 2) that are repositioned upon FANCL binding.  
958 Molecular figures prepared in PyMOL (Schrödinger, LLC).

959 B Ube2T backside  $\beta$ 1 double mutant (Thr23Arg, Trp25Gln) reveals binding defect with  
960 FANCL<sup>UR</sup> but is unaffected in FANCL<sup>R</sup> interaction. This suggests Ube2T backside  
961 supports additional FANCL interactions.

962 C End-point (30 min) multi-turnover ubiquitination assay with fluorescently labelled  
963 ubiquitin (Ub<sup>IR800</sup>) show Ube2T backside mutants are more defected in FANCL<sup>UR</sup>  
964 mediated FANCD2 ubiquitination than FANCI ubiquitination. Substrate  
965 ubiquitination is analysed by direct fluorescence monitoring (Li-COR Odyssey CLX).

966 D Effect of Ube2T backside mutants on the rates of FANCD2 and FANCI  
967 ubiquitination. Backside mutants reduce FANCI modification rate to levels observed  
968 in the no E3 setup. In contrast, a Ube2T backside  $\beta$ 1 double mutant (Thr23Arg,  
969 Trp25Gln) shows 75% loss in FANCD2 ubiquitination. Rates normalized to wildtype  
970 levels and plotted as mean  $\pm$  SD (n=3).

971 E FANCL independent Ube2T<sup>1-152</sup> autoubiquitination assay shows no effect of the  
972 backside  $\beta$ 1 double mutant in Lys91 autoubiquitination.

973 F Single-turnover ubiquitination assay (10 min) of a FANCD2-FANCI<sup>K523R</sup>-dsDNA  
974 (2:2:2  $\mu$ M) complex with increasing amounts of FANCL<sup>UR</sup> and 200 nM of Ube2T<sup>1-152</sup>.

975  $K91R \sim Ub^{IR800}$  thioester or Ube2T<sup>1-152, K91R</sup>  $\beta 1$  mutant  $\sim Ub^{IR800}$  thioester shows the  
976 defect in the latter cannot be completely rescued by increasing FANCL<sup>UR</sup> levels.

977 **Figure 4. Allosteric residue network reveals Ube2T active-site residues critical for**  
978 **substrate ubiquitination.**

979 A Allosteric network model shows dynamic rewiring of Ube2T intra-residue  
980 connections upon FANCL<sup>R</sup> binding. Dashed and orange lines depict Ube2T edges in  
981 unbound and FANCL<sup>R</sup> bound state respectively. Grey nodes have relative solvent  
982 accessibility of less than 10% in unbound Ube2T. Nodes involved in RING binding  
983 are clustered in a cyan box while those predicted to support backside interaction are  
984 clustered in a purple box. Nodes in loop7 and loop8 are in unshaded boxes. Red node  
985 denotes the catalytic cysteine (Cys86) while the network termini nodes (Arg84,  
986 Lys91, Lys95, Asp122 and Leu124) that are within 10 Å of Cys86 have a thick  
987 outline. Also depicted is the catalytic beta-element.

988 B End-point (30 min) multi-turnover ubiquitination assay with fluorescently labelled  
989 ubiquitin ( $Ub^{IR800}$ ) show mutations of the Ube2T network termini residues are  
990 detrimental to FANCL<sup>UR</sup> mediated FANCD2 and FANCI ubiquitination. Substrate  
991 ubiquitination is analysed by direct fluorescence monitoring (Li-COR Odyssey  
992 CLX).

993 C Ubiquitin charging assays of the network termini mutants show the Leu124Ala  
994 mutant alone is defected E1-based E2~Ub thioester formation.

995 D Lysine discharge assays show network termini mutants in loop7 (Lys91Ala +  
996 Lys95Ala) and loop8 (Asp122Ala) have catalytic defects while Arg84Ala is not  
997 defected. Graphs depict mean  $\pm$  SD (n=2).

998 E End-point (30 min) multi-turnover ubiquitination assay with fluorescently labelled  
999 ubiquitin ( $Ub^{IR800}$ ) show the requirement of Arg/Lys residues in loop7 while Arg84,

1000 in the catalytic  $\beta$ -element, is critical for FANCI and FANCD2 ubiquitination. Partial  
1001 compensation of activity for Ube2T Arg84Lys occurs only when the loop7 bears  
1002 longer Arg residues.

1003 **Figure 5. Ube2T deregulation leads to enhanced FANCL driven substrate**  
1004 **ubiquitination.**

1005 A Comparison of a network scheme (left) with structures of unbound (middle) and RING  
1006 bound (right) Ube2T depicting the proposed allosteric conduit. A gating role is  
1007 proposed for Glu54 (thick outline) for its regulation of Arg69. An effector role is  
1008 proposed for Arg69 for its role in stabilising the catalytic  $\beta$ -element leading to a  
1009 release of Arg84. Dashed and orange lines depict Ube2T edges in unbound and  
1010 FANCL<sup>R</sup> bound state respectively. Grey nodes have relative solvent accessibility of  
1011 less than 10% in unbound Ube2T. Molecular figures prepared in PyMOL  
1012 (Schrödinger, LLC).

1013 B End-point (30 min) multi-turnover ubiquitination assay with fluorescently labelled  
1014 ubiquitin (Ub<sup>IR800</sup>) shows Glu54 gating role is dependent on its negative side chain.  
1015 Removal of this charge leads to improved FANCL<sup>UR</sup> mediated substrate  
1016 ubiquitination. Substrate ubiquitination is analysed by direct fluorescence monitoring  
1017 (Li-COR Odyssey CLX).

1018 C End-point (30 min) multi-turnover ubiquitination assay with fluorescently labelled  
1019 ubiquitin (Ub<sup>IR800</sup>) shows effector role for Arg69 is linked to its positive side chain and  
1020 is regulated by the Glu54 gate. While removal of the Glu54 negative charge improves  
1021 improved FANCL<sup>UR</sup> mediated substrate ubiquitination, the removal of the Arg69  
1022 positive charge counters this effect.

1023 D End-point (30 min) multi-turnover ubiquitination assay of a FANCD2-FANCI<sup>K523R</sup>-  
1024 dsDNA (1:1:2  $\mu$ M) complex with fluorescently labelled ubiquitin (Ub<sup>IR800</sup>) shows a

1025 permissive gate at position 54 (Glu54Arg) can rescue FANCD2 ubiquitination defects  
1026 arising from the loop2-loop7 hybrid mutant (Asp32Ala, Asp33Ala, Leu92Ala), the  
1027 backside  $\beta$ 1 double mutant (Thr23Arg, Trp25Gln) as well as the RING binding mutant  
1028 (Phe63Ala). Despite deregulation of the RING binding Ube2T Glu54Arg + Phe63Ala  
1029 double mutant, FANCL is still required for efficient FANCD2 ubiquitination.

1030 E Effects of the Ube2Tv1 variant with a permissive gate (Glu54Arg) alongside the  
1031 Ube2Tv3 variant containing a permissive gate and flexible loop7 (Glu54Arg,  
1032 Pro93Gly, Pro94Gly) on the rates of FANCL<sup>UR</sup> mediated FANCD2 (FANCI<sup>K523R</sup>-  
1033 FANCD2-dsDNA complex) and FANCI (FANCI-dsDNA complex) ubiquitination.

1034 F End-point (30 min) multi-turnover ubiquitination assay of isolated FANCD2 and  
1035 FANCI substrates with no DNA cofactors. Titration of FANCL<sup>UR</sup> - Ube2Tv3 enzymes  
1036 shows how substrate ubiquitination is enhanced by the deregulated E2 without  
1037 compromising on site-specificity.

1038 G Allosteric model for FANCL<sup>UR</sup> mediated activation of Ube2T. FANCL binding at  
1039 classical RING-E2 interface and the backside E2 interface triggers long-range and  
1040 short-range rewiring of Ube2T residue networks that culminate in substrate  
1041 ubiquitination. The dynamic allosteric network is intrinsically regulated by conserved  
1042 Ube2T elements, the allosteric  $\beta$ 3 gating residue and a rigid loop7.

1043 **Supplementary Figure 1. Solution and sequence profile of FANCL<sup>UR</sup> with Ube2T**  
1044 **sequence conservation.**

1045 A Analytical size-exclusion chromatography of FANCL<sup>UR</sup> using Superdex75 10/300 GL  
1046 column (blue trace). Gel-filtration standards (dashed trace) with known elution profile  
1047 were also run in same buffer system as FANCL<sup>UR</sup> and the traces were overlaid. The  
1048 FANCL<sup>UR</sup> fragment resolves as a monomeric protein however, the moderate shift to  
1049 an earlier elution volume suggests the central UBC-RWD and C-terminal RING



1050 domain adopt an extended conformation as observed in the fly FANCL structure  
1051 (PDB ID 3k11).

1052 B Sequencing alignment of the C-terminal regions of various RING domains that have  
1053 been characterised to have a linchpin Arg residue (blue highlight). FANCL appears to  
1054 lack such a residue at the analogous position. Structure of the RNF4 linchpin residue  
1055 (Arg181, green cartoon, PDB ID 4ap4) shows how the linchpin contacts both the E2  
1056 (Ube2D1, orange cartoon) and donor ubiquitin (yellow cartoon). In contrast, the  
1057 equivalent FANCL residue Ser363 would not stabilise such conformation. Zinc co-  
1058 ordinating cysteine residues are in bold. PDB IDs of respective structures are listed  
1059 alongside. Molecular figures prepared in PyMOL (Schrödinger, LLC).

1060 C Sequence conservation of the UBC fold between Ube2T homologs. Residues shaded  
1061 in red to yellow to highlight conservation, where red corresponds to strict  
1062 conservation. Depicted above the sequences (grey) are secondary structure elements  
1063 of human Ube2T are based on PDB ID 1yh2. Red star indicates catalytic cysteine  
1064 while coloured circles indicate human Ube2T residues mutated in this study; blue in  
1065 Figure 2, cyan in Figure 3, purple in Figure 4 and green in Figure 5.

1066 **Supplementary Figure 2. Activity and binding profile of Ube2T loop2 and loop7**  
1067 **residues.**

1068 A Representative time-course ubiquitination assays with fluorescently labelled ubiquitin  
1069 (Ub<sup>IR800</sup>) used to derive substrate ubiquitination rates depicted in Figure 2C. Substrate  
1070 ubiquitination is analysed by direct fluorescence monitoring (Li-COR Odyssey CLX).

1071 B Ubiquitin charging assays of Ube2T loop2 and loop7 mutants show that the mutants  
1072 do not affect E1-based E2~Ub thioester formation.

1073 C Thermodynamics of FANCL<sup>R</sup> interaction with Ube2T wildtype (left) and Ube2T  
1074 loop2-loop7 hybrid mutant (middle) shows similar contrast in binding enthalpy profile  
1075 as observed with FANCL<sup>UR</sup>. Graphs (right) plotted as mean  $\pm$  range (n=2).

1076 **Supplementary Figure 3. Activity profile of Ube2T backside residues.**

1077 A Representative time-course ubiquitination assays with fluorescently labelled ubiquitin  
1078 (Ub<sup>IR800</sup>) used to derive substrate ubiquitination rates depicted in Figure 3D. Substrate  
1079 ubiquitination is analysed by direct fluorescence monitoring (Li-COR Odyssey CLX).  
1080 B Ubiquitin charging assays of Ube2T backside mutants show that the mutants do not  
1081 affect E1-based E2~Ub thioester formation.

1082 **Supplementary Figure 4. Ube2T residue network profile and characterization of**  
1083 **network termini residues**

1084 A Summary of nodes and edges (top left) in the individual Ube2T residue interaction  
1085 networks (RINs). Mosaic plots of edge distribution profile derived from RIN  
1086 comparison (bottom left). Complete profile of edges and nodes obtained after merging  
1087 the RIN comparison networks. Dashed and orange lines depict Ube2T edges in  
1088 unbound and FANCL<sup>R</sup> bound state respectively. Thin grey lines depict edges that are  
1089 shared in both networks. Grey nodes have relative solvent accessibility of less than  
1090 10% in unbound Ube2T. Red node denotes the catalytic cysteine (Cys86).  
1091 B Structural overlay (top) of unbound and RING bound Ube2T structures focussing on  
1092 network termini residues surrounding the catalytic cysteine. Sequence alignment  
1093 (bottom) of Ube2T catalytic site with various other human E2s reveal how the termini  
1094 of Ube2T network (indicated by boxes) vary among the enzyme family. Catalytic  
1095 cysteine is shown in red. Molecular figures prepared in PyMOL (Schrödinger, LLC).

- 1096 C Representative gels of lysine discharge assays plotted in Figure 4D. Coomassie  
1097 stained gels are visualized by direct fluorescence monitoring in the red channel (Li-  
1098 COR Odyssey CLX).
- 1099 D Total network profile of Arg84 residue present in Ube2T catalytic  $\beta$ -element. Listed  
1100 alongside are edges that involve the Arg84 side chain. Edge depiction is same as in  
1101 panel A.
- 1102 E Acidic/polar residues found proximal to target lysine on FANCD2 (left, green  
1103 cartoon) and FANCI (right, blue cartoon) based on the mouse FANCI-FANCD2  
1104 complex structure (PDB ID 3s4w). Sequence alignment (middle) shows conservation  
1105 of these acidic/polar residues (boxed). Respective target lysine is depicted in blue.  
1106 Molecular figures prepared in PyMOL (Schrödinger, LLC).

1107 **Supplementary Figure 5. Activity profile of deregulated Ube2B and Ube2T variants**

- 1108 A Comparison of a network scheme (top left) with structures of unbound (top middle,  
1109 PDB ID 2yb6) and Rad6 Binding Domain (R6BD) bound (top right, PDB ID 2ybf)  
1110 Ube2B depicting the proposed gating and effector roles for Ube2B residues Glu58  
1111 (thick outline) and Arg71 respectively. Green dashed and green lines depict Ube2B  
1112 edges in unbound and R6BD bound states respectively. Grey lines depict common  
1113 connections in the two Ube2B states while grey nodes have relative solvent  
1114 accessibility of less than 10% in unbound E2. Immunoblots of an end-point (90 min)  
1115 multi-turnover PCNA ubiquitination assay (bottom) shows Ube2B with a permissive  
1116 Glu54Arg gate is more sensitive to increasing amounts of Rad18 E3 in substrate  
1117 ubiquitination. Control immunoblots anti-Rad18 (middle) and anti-Ube2B (bottom)  
1118 show levels of E3 and E2 respectively.

1119 B Representative time-course ubiquitination assays with fluorescently labelled ubiquitin  
1120 (Ub<sup>IR800</sup>) used to derive substrate ubiquitination rates depicted in Figure 5E. Substrate  
1121 ubiquitination is analysed by direct fluorescence monitoring (Li-COR Odyssey CLX).

1122 C Structures of human E2s with the proposed  $\beta 3$  gating residue (bold label), restrictive  
1123 in red boxes while permissive in green boxes. Depicted below is a sequence alignment  
1124 of human E2s, restrictive gate highlighted in red while permissive gate in green.  
1125 Highlighted in grey is the proposed effector residue linked with the gate. Ube2T and  
1126 Ube2B sequences are aligned as reference. Highlighted in grey is the proposed  
1127 effector residue linked with the gate. Catalytic cysteine is also indicated (clear box).  
1128 Molecular figures prepared in PyMOL (Schrödinger, LLC).

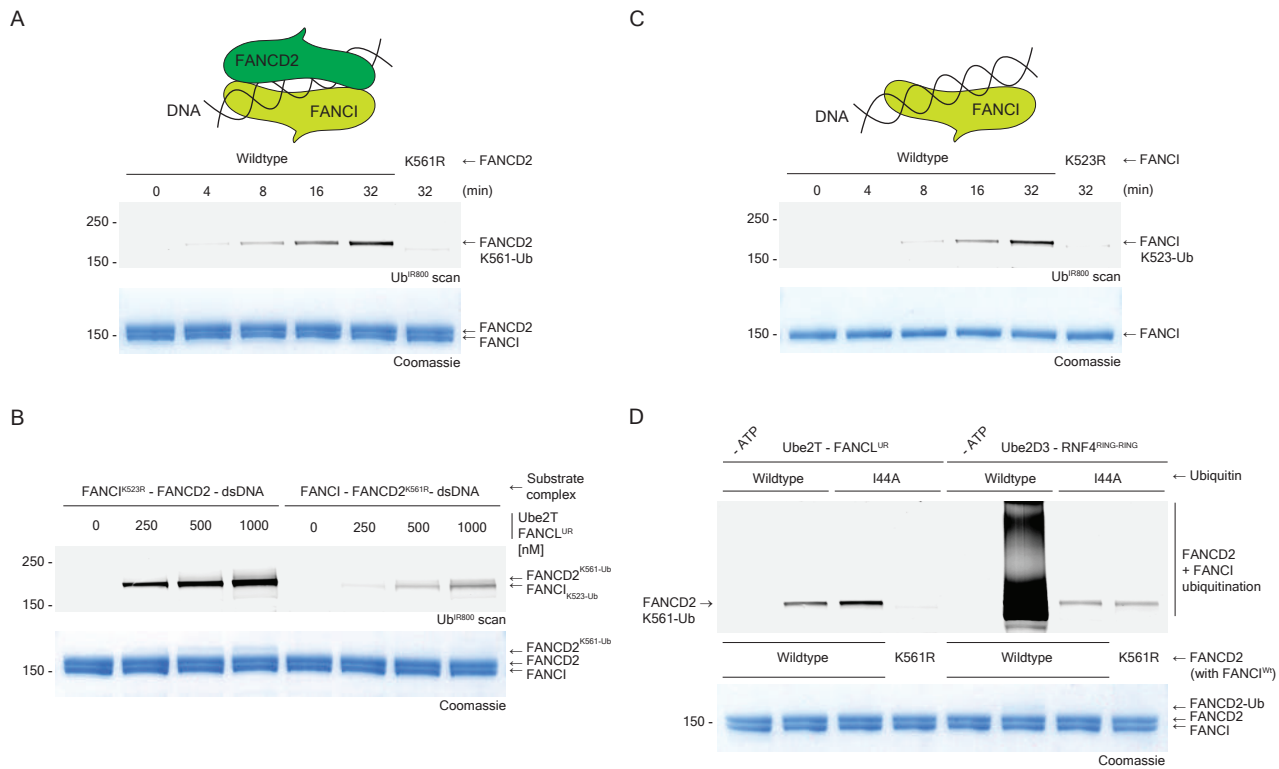

Figure 1. FANCL<sup>UR</sup> mediated FANCD2 ubiquitination does not require the ubiquitin Ile44-patch.

A. Time-course multi-turnover ubiquitination assays with fluorescently labelled ubiquitin (Ub<sup>IR800</sup>) showing FANCL<sup>UR</sup> (0.1 μM) and Ube2T (0.1 μM) mediated site-specific mono-ubiquitination of Lys561 FANCD2 (1.0 μM) when present as a FANCD2-FANCI-dsDNA (1:1:2 μM) complex.

B. Titration of FANCL<sup>UR</sup> - Ube2T enzymes on FANCD2-FANCI-dsDNA (1:1:2 μM) complexes with single target lysine i.e. Lys561 FANCD2 or Lys523 FANCI reveals the FANCI site can be targeted but the FANCD2 site is preferred.

C. Time-course multi-turnover ubiquitination assays with fluorescently labelled ubiquitin (Ub<sup>IR800</sup>) showing FANCL<sup>UR</sup> (0.1 μM) and Ube2T (0.1 μM) mediated site-specific mono-ubiquitination of Lys523 FANCI (1.0 μM) when present as a FANCI-dsDNA (1:2 μM) complex.

D. Comparing FANCD2-FANCI-dsDNA (1:1:2 μM) ubiquitination activities of the FANCL<sup>UR</sup> (0.1 μM) - Ube2T (0.1 μM) pair with RNF4<sup>RING-RING</sup> (0.1 μM) - Ube2D3 (0.2 μM) pair using fluorescently labelled wildtype and Ile44Ala ubiquitin. RNF4<sup>RING-RING</sup> and Ube2D3 robustly ubiquitinate FANCI-FANCD2 using wildtype ubiquitin, but is dramatically impaired by the Ile44Ala mutant while the FANCL<sup>UR</sup> and Ube2T maintain activity and site-specificity even with the ubiquitin mutant. Substrate ubiquitination is analysed by direct fluorescence monitoring (Li-COR Odyssey CLX).

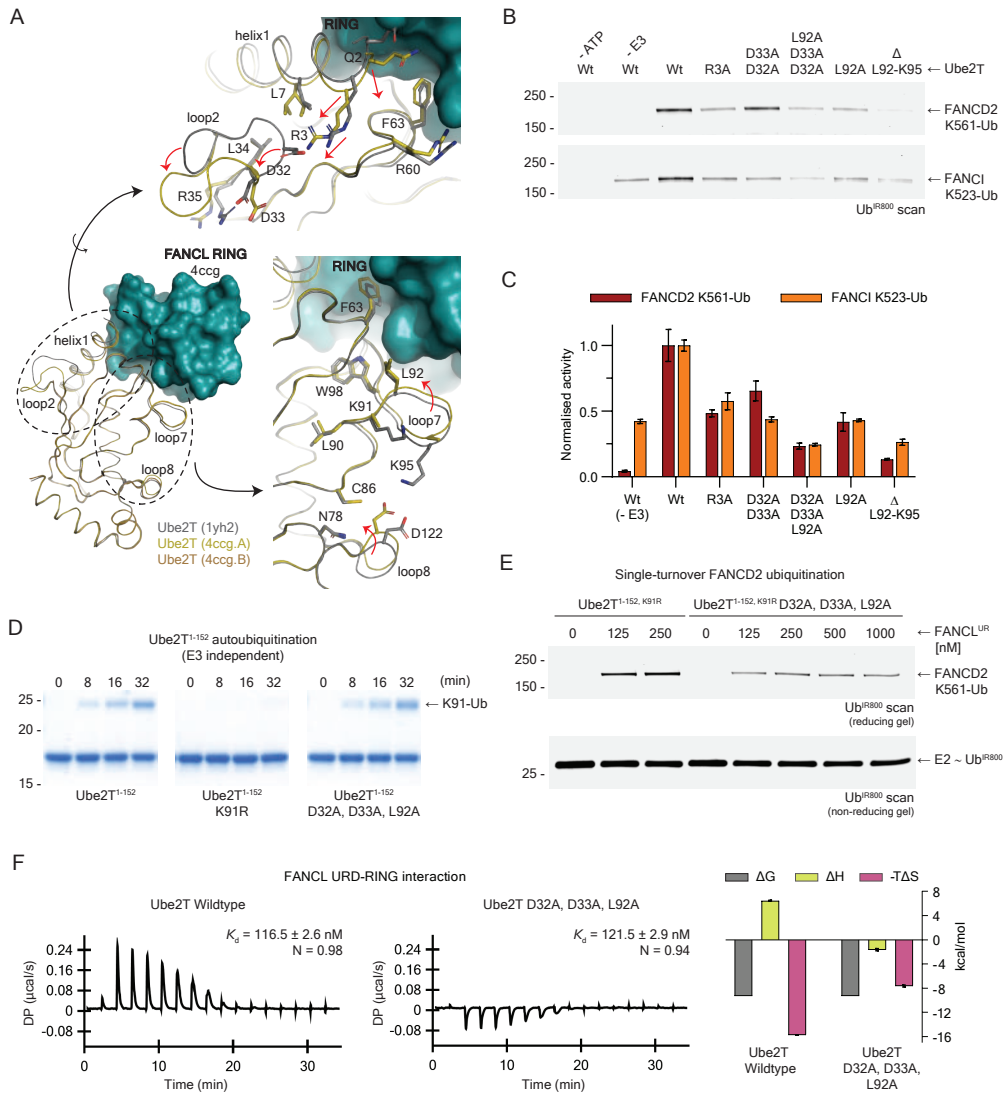

Figure 2. FANCL induced dynamics of Ube2T loop2 and loop7 is required for substrate ubiquitination.

A. Superpose of FANCL<sup>R</sup> (teal surface) bound copies of Ube2T (olive ribbon, PDB ID 4ccg.A and brown ribbon, PDB ID 4ccg.B) with the unbound Ube2T (grey ribbon) structure (PDB ID 1yh2) showing little overall structural change. Close-up of helix1-loop2 region (top) and loop7-loop8 region (bottom) reveal local changes. Molecular figures prepared in PyMOL (Schrödinger, LLC).

B. End-point (30 min) multi-turnover ubiquitination assay with fluorescently labelled ubiquitin (Ub<sup>R800</sup>) show conserved residues in Ube2T helix1, loop2 and loop7 are required for FANCLUR mediated FANCD2 and FANCI ubiquitination. Substrate ubiquitination is analysed by direct fluorescence monitoring (Li-COR Odyssey CLX).

C. Effect of Ube2T helix1, loop2 and loop7 mutants on rates of FANCD2 and FANCI ubiquitination. A loop2-loop7 hybrid mutant (Asp32Ala, Asp33Ala, Leu92Ala) shows 75% loss in substrate ubiquitination rates. Rates normalized to wildtype levels and plotted as mean ± SD (n=3).

D. FANCL independent Ube2T<sup>1-152</sup> autoubiquitination assay shows no effect of loop2-loop7 hybrid mutant in Lys91 autoubiquitination.

E. Single-turnover ubiquitination assay (10 min) of a FANCD2-FANCI<sup>K523R</sup>-dsDNA (2:2:2 μM) complex with increasing amounts of FANCL<sup>UR</sup> and 200 nM of Ube2T<sup>1-152, K91R</sup> ~ Ub<sup>R800</sup> thioester or Ube2T<sup>1-152, K91R</sup> loop2-loop7 hybrid mutant ~ Ub<sup>R800</sup> thioester shows the latter is defective in modifying Lys561 FANCD2.

F. Thermodynamics of FANCL<sup>UR</sup> interaction with Ube2T wildtype (left) and Ube2T loop2-loop7 hybrid mutant (middle) shows no change in binding affinity but divergent binding enthalpy. The cost of favourable enthalpy for the mutant is offset by reduced conformational entropy thus contributing to reduced activity. Graphs (right) plotted as mean ± range (n=2).

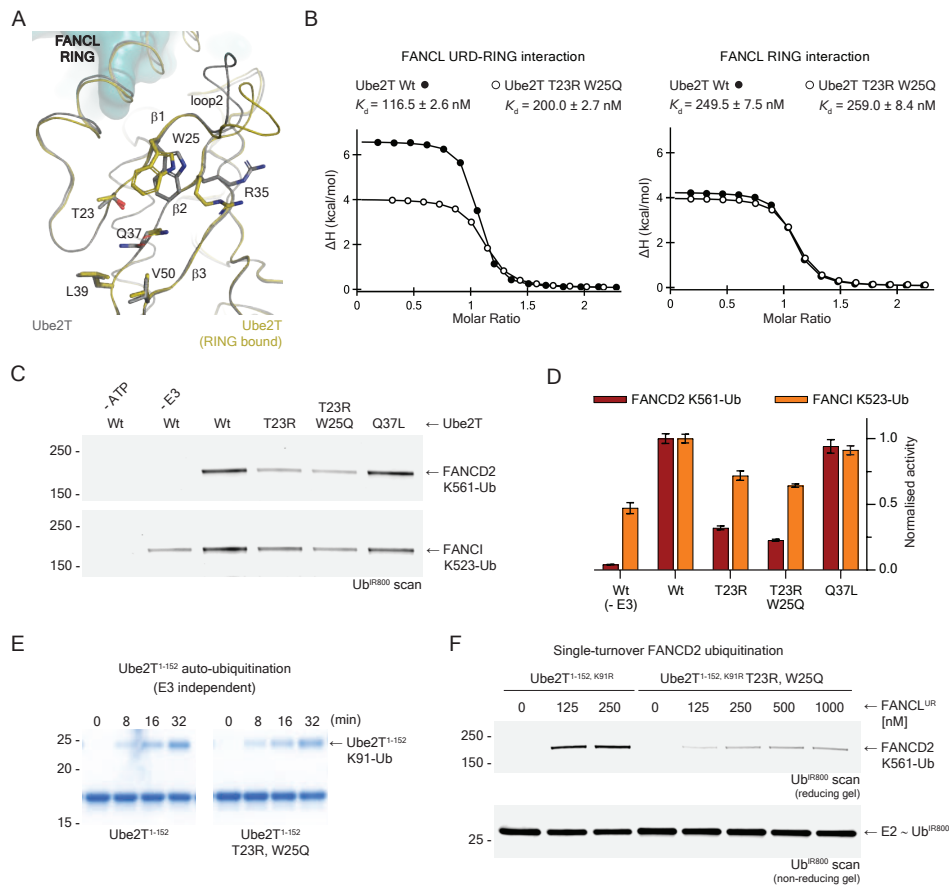

Figure 3. Novel role of Ube2T backside in FANCL mediated substrate ubiquitination.

A. Superpose of FANCL<sup>R</sup> (teal surface) bound copy of Ube2T (olive ribbon, PDB ID 4ccg.A) with unbound Ube2T (grey ribbon) structure (PDB ID 1yh2) showing residues on E2 backside ( $\beta 1$  and  $\beta 2$ ) that are repositioned upon FANCL binding. Molecular figures prepared in PyMOL (Schrödinger, LLC).

B. Ube2T backside  $\beta 1$  double mutant (Thr23Arg, Trp25Gln) reveals binding defect with FANCL<sup>UR</sup> but is unaffected in FANCL<sup>R</sup> interaction. This suggests Ube2T backside supports additional FANCL interactions.

C. End-point (30 min) multi-turnover ubiquitination assay with fluorescently labelled ubiquitin (Ub<sup>R800</sup>) show Ube2T backside mutants are more defected in FANCL<sup>UR</sup> mediated FANCD2 ubiquitination than FANCI ubiquitination. Substrate ubiquitination is analysed by direct fluorescence monitoring (Li-COR Odyssey CLX).

D. Effect of Ube2T backside mutants on the rates of FANCD2 and FANCI ubiquitination. Backside mutants reduce FANCI modification rate to levels observed in the no E3 setup. In contrast, a Ube2T backside  $\beta 1$  double mutant (Thr23Arg, Trp25Gln) shows 75% loss in rate of FANCD2 ubiquitination. Rates normalized to wildtype levels and plotted as mean  $\pm$  SD (n=3).

E. FANCL independent Ube2T<sup>1-152</sup> auto-ubiquitination assay shows no effect of backside  $\beta 1$  double mutant in Lys91 auto-ubiquitination.

F. Single-turnover ubiquitination assay (10 min) of a FANCD2-FANCI<sup>K523R</sup>-dsDNA (2:2:2  $\mu$ M) complex with increasing amounts of FANCL<sup>UR</sup> and 200 nM of Ube2T<sup>1-152, K91R</sup> ~ Ub<sup>R800</sup> thioester or Ube2T<sup>1-152, K91R</sup>  $\beta 1$  mutant ~ Ub<sup>R800</sup> thioester shows the defect in the latter cannot be completely rescued by increasing FANCL<sup>UR</sup> levels.

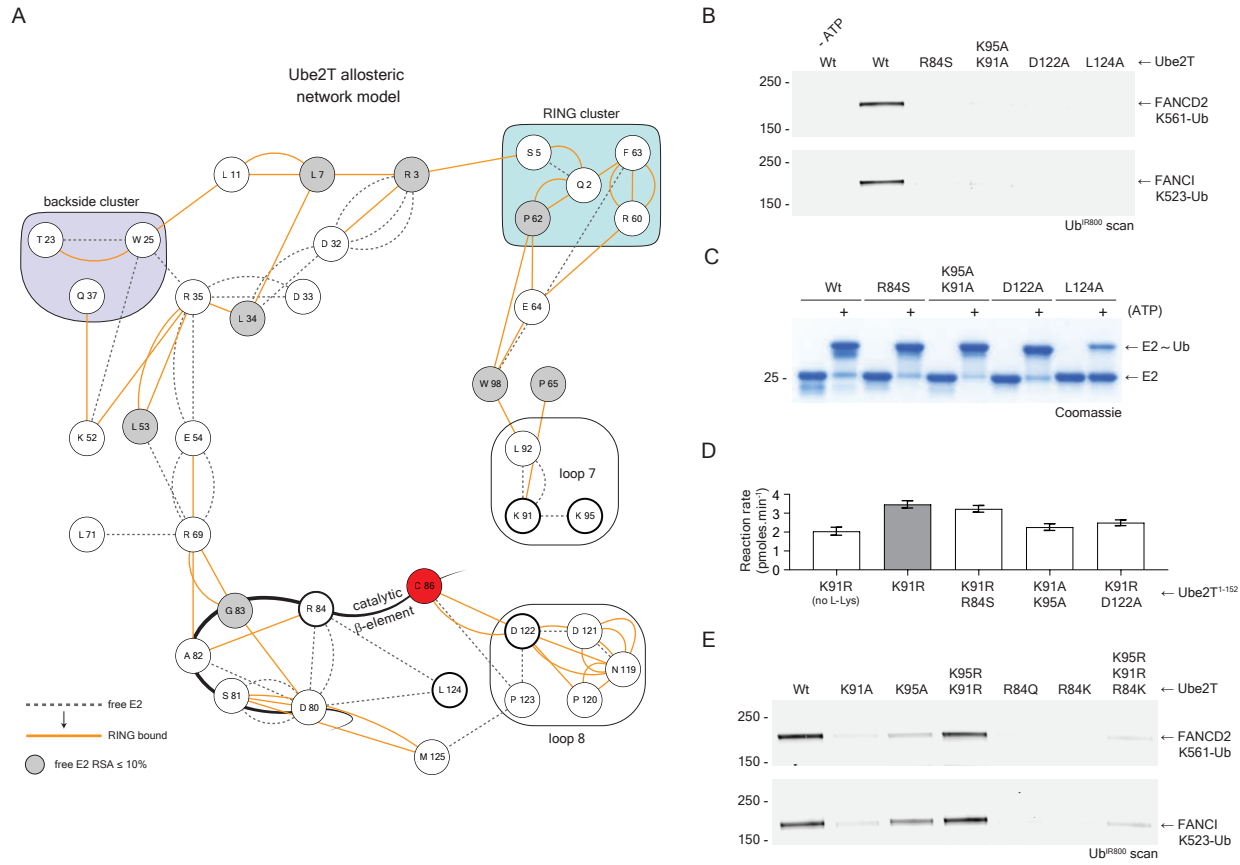

Figure 4. Allosteric residue network reveals Ube2t active-site residues critical for substrate ubiquitination.

A. Allosteric network model shows dynamic rewiring of Ube2T inter-residue connections upon FANCL<sup>R</sup> binding. Dashed and orange lines depict Ube2T edges in unbound and FANCL<sup>R</sup> bound state respectively. Grey nodes have relative solvent accessibility of less than 10% in unbound Ube2T. Nodes involved in RING binding are clustered in a cyan box while those predicted to support backside interaction are clustered in a purple box. Nodes in loop7 and loop8 are in unshaded boxes. Red node denotes the catalytic cysteine (Cys86) while the network termini nodes (Arg84, Lys91, Lys95, Asp122 and Leu124) that are within 10 Å of Cys86 have a thick outline. Also depicted is the catalytic  $\beta$ -element.

B. End-point (30 min) multi-turnover ubiquitination assay with fluorescently labelled ubiquitin (Ub<sup>IR800</sup>) show mutations of the Ube2T network termini residues are detrimental to FANCL<sup>UR</sup> mediated FANCD2 and FANCI ubiquitination. Substrate ubiquitination is analysed by direct fluorescence monitoring (Li-COR Odyssey CLX).

C. Ubiquitin charging assays of the network termini mutants show the Leu124Ala mutant alone is defective in E1-based E2 - Ub thioester formation.

D. Lysine discharge assays show network termini mutants in loop7 (Lys91Ala + Lys95Ala) and loop8 (Asp122Ala) have catalytic defects while Arg84Ala is not detected. Graphs depict mean  $\pm$  SD (n=2).

E. End-point (30 min) multi-turnover ubiquitination assay with fluorescently labelled ubiquitin (Ub<sup>IR800</sup>) show the requirement of Arg/Lys residues in loop7 while Arg84, in the catalytic  $\beta$ -element, is critical for FANCI and FANCD2 ubiquitination. Partial compensation of activity for Ube2T Arg84Lys occurs only when the loop7 bears longer Arg residues.



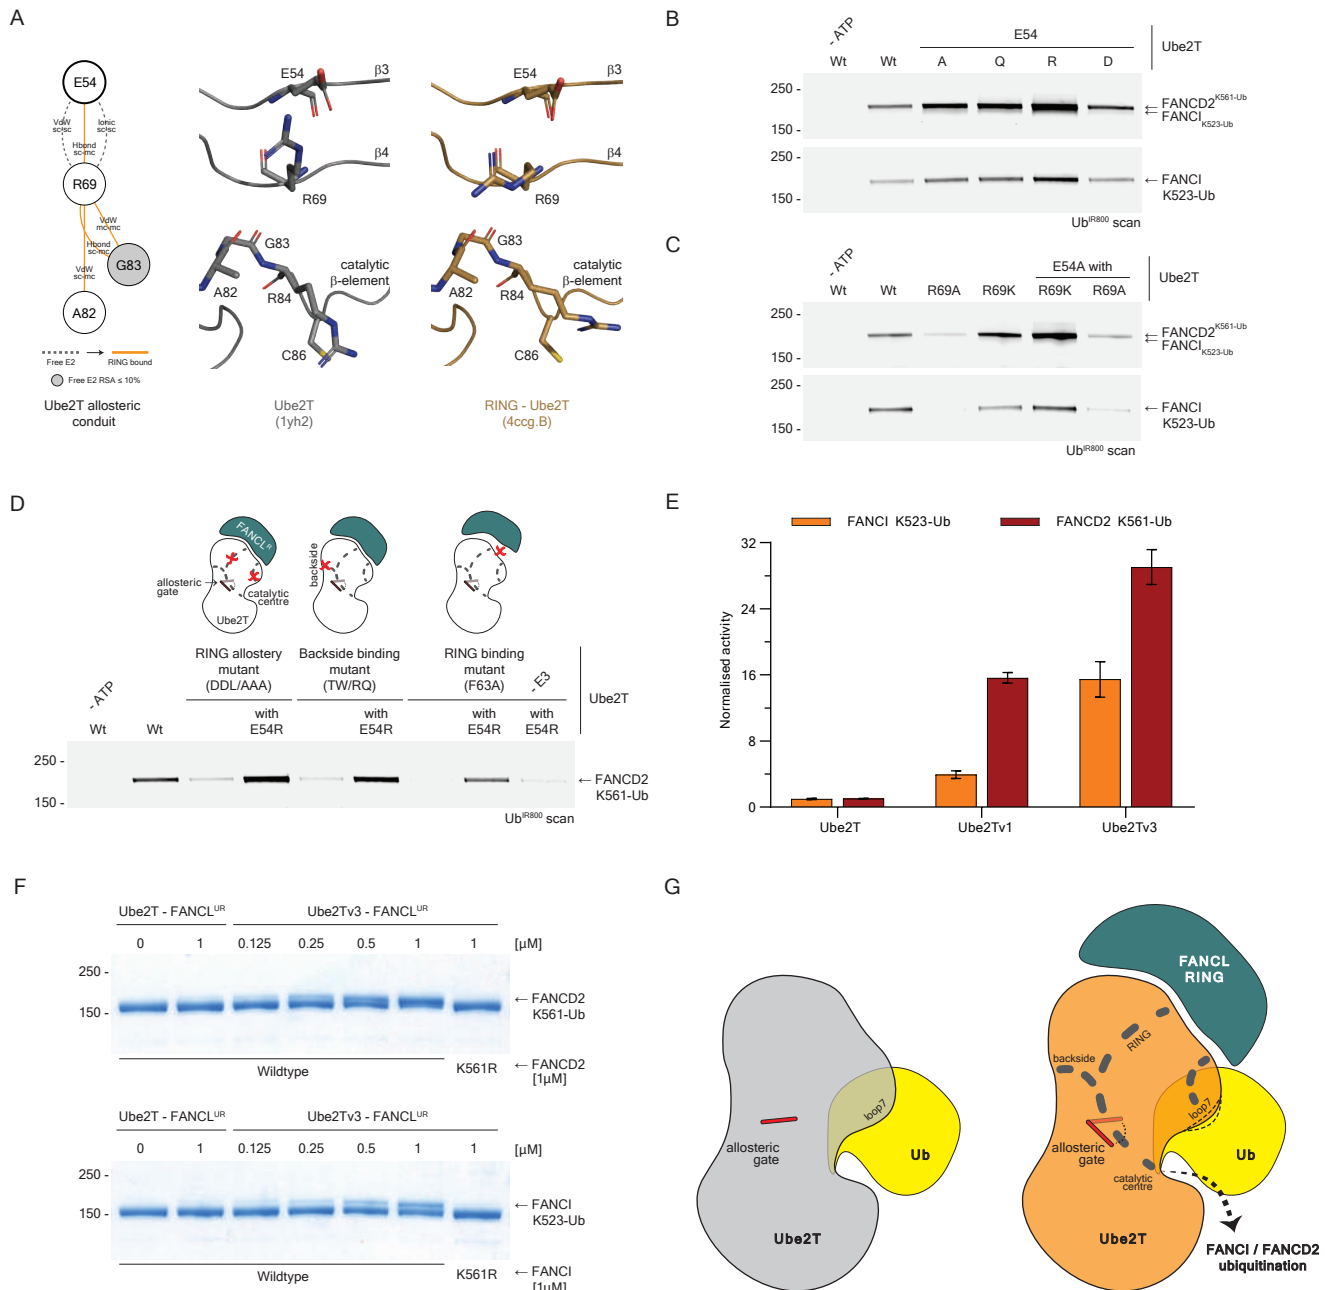

Figure 5. Ube2T deregulation leads to enhanced FANCL driven substrate ubiquitination.

A. Comparison of a network scheme (left) with structures of unbound (middle) and RING bound (right) Ube2T depicting the proposed allosteric conduit. A gating role is proposed for Glu54 (thick outline) for its regulation of Arg69. An effector role is proposed for Arg69 for its role in stabilising the catalytic  $\beta$ -element leading to a release of Arg84. Dashed and orange lines depict Ube2T edges in unbound and FANCL<sup>R</sup> bound state respectively. Grey nodes have relative solvent accessibility of less than 10% in unbound Ube2T.

B. End-point (30 min) multi-turnover ubiquitination assay with fluorescently labelled ubiquitin (Ub<sup>R800</sup>) shows Glu54 gating role is dependent on its negative side chain. Removal of this charge leads to improved FANCL<sup>UR</sup> mediated substrate ubiquitination. Substrate ubiquitination is analysed by direct fluorescence monitoring (Li-COR Odyssey CLX).

C. End-point (30 min) multi-turnover ubiquitination assay with fluorescently labelled ubiquitin (Ub<sup>R800</sup>) shows effector role for Arg69 is linked to its positive side chain and is regulated by the Glu54 gate. While removal of the Glu54 negative charge improves improved FANCL<sup>UR</sup> mediated substrate ubiquitination, the removal of the Arg69 positive charge counters this effect.

D. End-point (30 min) multi-turnover ubiquitination assay of a FANCD2-FANCI<sup>K523R</sup>-dsDNA (1:1:2  $\mu$ M) complex with fluorescently labelled ubiquitin (Ub<sup>R800</sup>) shows a permissive gate at position 54 (Glu54Arg) can rescue FANCD2 ubiquitination defects arising from the loop2-loop7 hybrid mutant (Asp32Ala, Asp33Ala, Leu92Ala), the backside  $\beta$ 1 double mutant (Thr23Arg, Trp25Gln) as well as the RING binding mutant (Phe63Ala). Despite deregulation of the RING binding Ube2T Glu54Arg + Phe63Ala double mutant, FANCL is still required for efficient FANCD2 ubiquitination.

E. Effects of the Ube2Tv1 variant with a permissive gate (Glu54Arg) alongside the Ube2Tv3 variant containing both a permissive gate and flexible loop7 (Glu54Arg, Pro93Gly, Pro94Gly) on the rates of FANCL<sup>UR</sup> mediated FANCD2 (FANCI<sup>K523R</sup>-FANCD2-dsDNA complex) and FANCI (FANCI-dsDNA complex) ubiquitination.

F. End-point (30 min) multi-turnover ubiquitination assay of isolated FANCD2 and FANCI substrates with no DNA cofactors. Titration of FANCL<sup>UR</sup> - Ube2Tv3 enzymes shows how substrate ubiquitination is enhanced by the deregulated E2 without compromising on site-specificity.

G. Allosteric model for FANCL<sup>UR</sup> mediated activation of Ube2T. FANCL binding at classical RING-E2 interface and the backside E2 interface triggers long-range and short-range rewiring of Ube2T residue networks that culminate in substrate ubiquitination. The dynamic allosteric network is intrinsically regulated by conserved Ube2T elements, the allosteric  $\beta$ 3 gating residue and a rigid loop7.

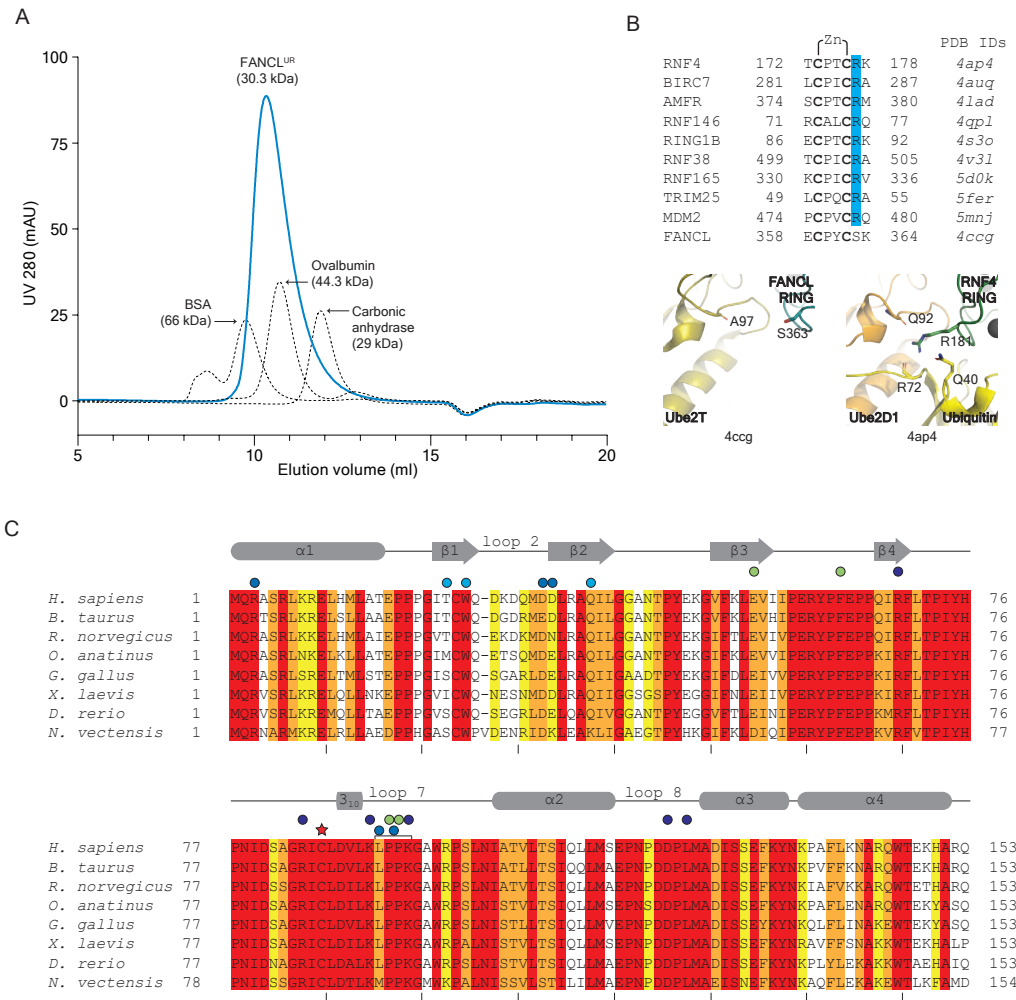

Supplementary Figure 1. Solution and sequence profile of FANCL<sup>UR</sup> with Ube2T sequence conservation

A. Analytical size-exclusion chromatography of FANCL<sup>UR</sup> using Superdex75 10/300 GL column (blue trace). Gel-filtration standards (dashed trace) with known elution profile were also run in same buffer system as FANCL<sup>UR</sup> and the traces were overlaid. The FANCL<sup>UR</sup> fragment resolves as a monomeric protein however, the moderate shift to an earlier elution volume suggests the central UBC-RWD and C-terminal RING domain adopt an extended conformation as observed in the fly FANCL structure (PDB ID 3k1l).

B. Sequencing alignment of the C-terminal regions of various RING domains that have been characterised to have a linchpin Arg residue (blue highlight). FANCL appears to lack such a residue at the analogous position. Structure of the RNF4 linchpin residue (Arg181, green cartoon, PDB ID 4ap4) shows how the linchpin contacts both the E2 (Ube2D1, orange cartoon) and donor ubiquitin (yellow cartoon). In contrast, the equivalent FANCL residue Ser363 would not stabilise such conformation. Zinc co-ordinating cysteine residues are in bold. PDB IDs of respective structures are listed alongside. Molecular figures prepared in PyMOL (Schrödinger, LLC).

C. Sequence conservation of the UBC fold between Ube2T homologs. Residues shaded in red to yellow to highlight conservation, where red corresponds to strict conservation. Depicted above the sequences (grey) are secondary structure elements of human Ube2T are based on PDB ID 1yh2. Red star indicates catalytic cysteine while coloured circles indicate human Ube2T residues mutated in this study; blue in Figure 2, cyan in Figure 3, purple in Figure 4 and green in Figure 5.

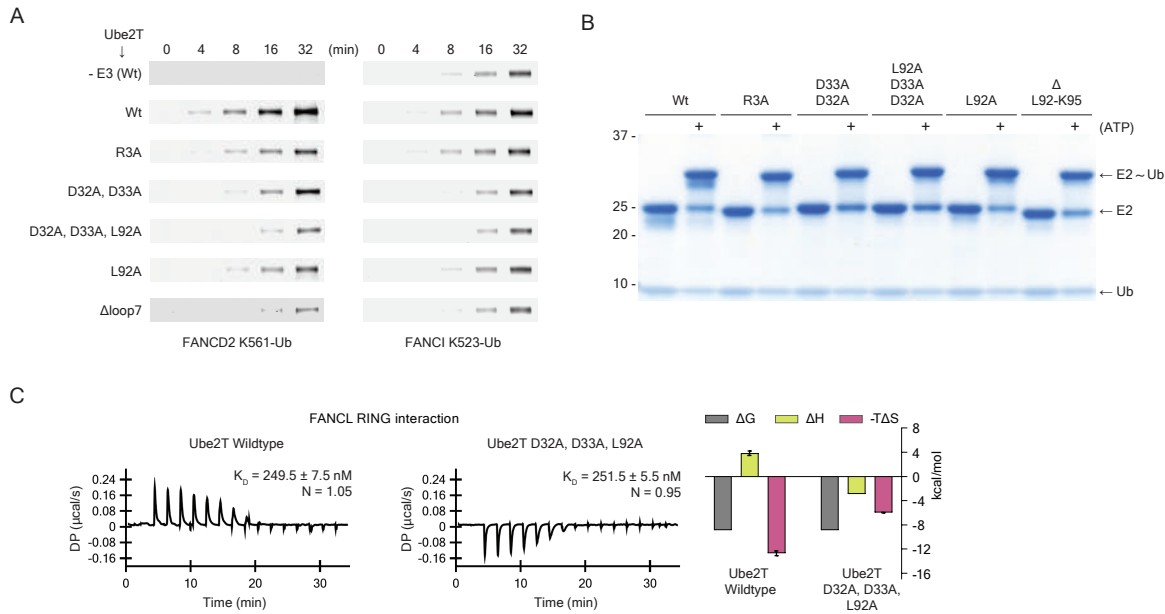

Supplementary Figure 2. Activity and binding profile of Ube2T loop2 and loop7 residues.

A. Representative time-course ubiquitination assays with fluorescently labelled ubiquitin ( $Ub^{IR600}$ ) used to derive substrate ubiquitination rates depicted in Figure 2C. Substrate ubiquitination is analysed by direct fluorescence monitoring (Li-COR Odyssey CLX).

B. Ubiquitin charging assays of the loop2 and loop7 mutants show that the mutants do not affect E1-based E2-Ub thioester formation.

C. Thermodynamics of FANCL<sup>UR</sup> interaction with Ube2T wildtype (left) and Ube2T loop2-loop7 hybrid mutant (middle) shows similar contrast in binding enthalpy as observed with FANCL<sup>UR</sup>. Graphs (right) plotted as mean  $\pm$  range (n=2).

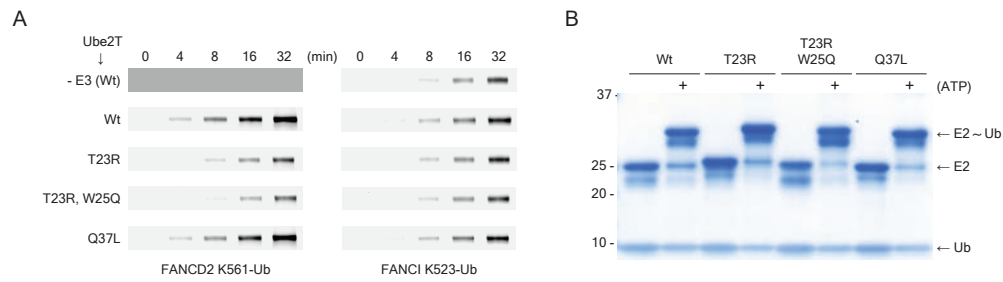

Supplementary Figure 3. Activity profile of Ube2T backside residues.

A. Representative time-course ubiquitination assays with fluorescently labelled ubiquitin (Ub<sup>R800</sup>) used to derive substrate ubiquitination rates depicted in Figure 3D. Substrate ubiquitination is analysed by direct fluorescence monitoring (Li-COR Odyssey CLX).

B. Ubiquitin charging assays of Ube2T backside mutants show that the mutants do not affect E1-based E2-Ub thioester formation.

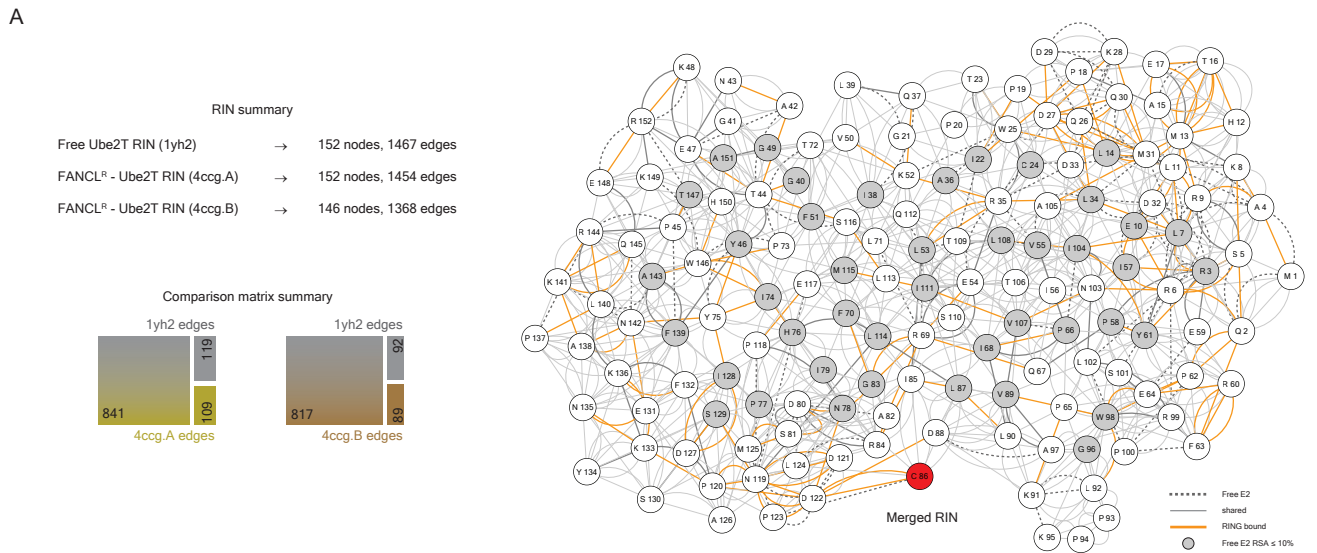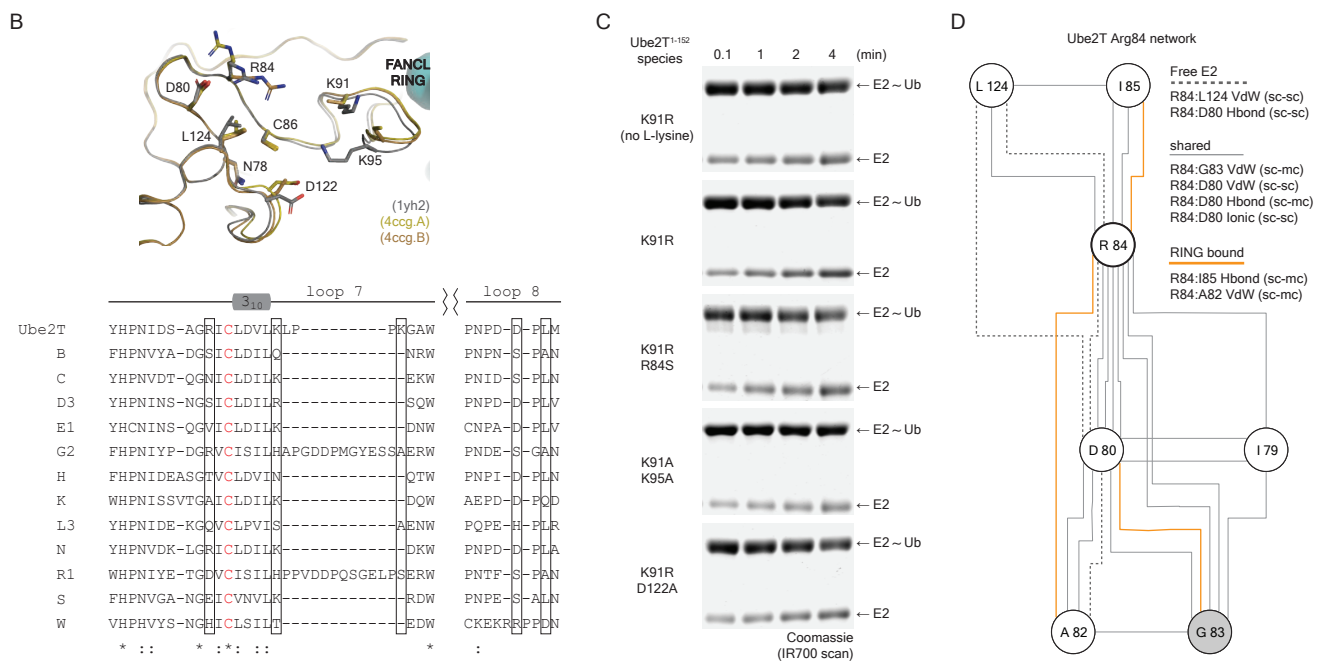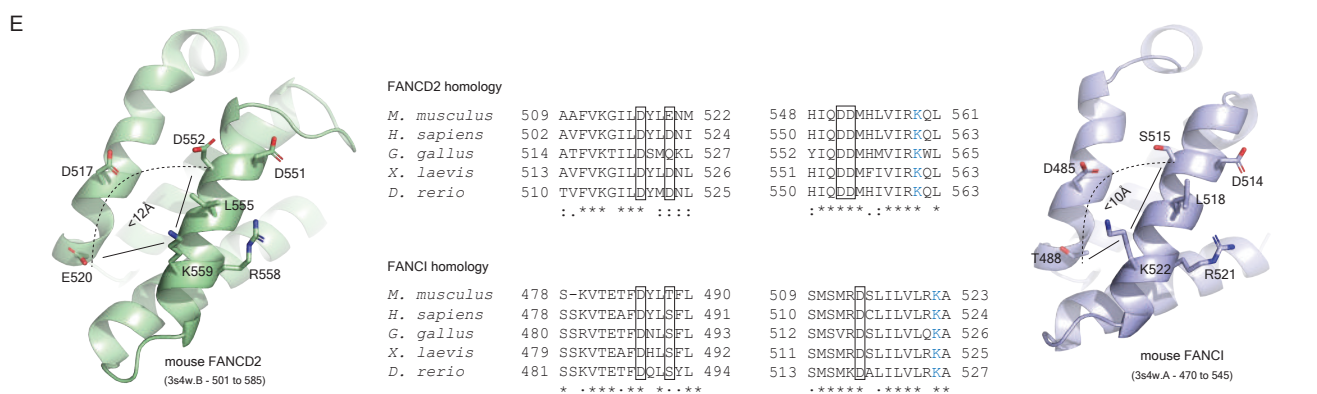

Supplementary Figure 4. Ube2T residue network profile and characterization of network termini residues

A. Summary of nodes and edges (top left) in the individual Ube2T residue interaction networks (RINs). Mosaic plots of edge distribution profile derived from RIN comparison (bottom left). Complete profile of edges and nodes obtained after merging the RIN comparison networks. Dashed and orange lines depict Ube2T edges in unbound and FANCL<sup>R</sup> bound state respectively. Thin grey lines depict edges that are shared in both networks. Grey nodes have relative solvent accessibility of less than 10% in unbound Ube2T. Red node denotes the catalytic cysteine (Cys86).

B. Structural overlay (top) of unbound and RING bound Ube2T structures focussing on network termini residues surrounding the catalytic cysteine. Sequence alignment (bottom) of Ube2T catalytic site with various other human E2s reveal the termini of Ube2T network (indicated by boxes) vary among the enzyme family. Catalytic cysteine is shown in red.

C. Representative gels of lysine discharge assays plotted in Figure 4D. Coomassie stained gels are visualized by direct fluorescence monitoring in the red channel (Li-COR Odyssey CLX).

D. Total network profile of Arg84 residue present in Ube2T catalytic  $\beta$ -element. Listed alongside are edges that involve the Arg84 side chain. Edge depiction is same as in panel A.

E. Acidic/polar residues found proximal to target lysine on FANCD2 (left, green cartoon) and FANCI (right, blue cartoon) based on the mouse FANCI-FANCD2 complex structure (PDB ID 3s4w). Sequence alignment (middle) shows conservation of these acidic/polar residues (boxed). Respective target lysine is depicted in blue.

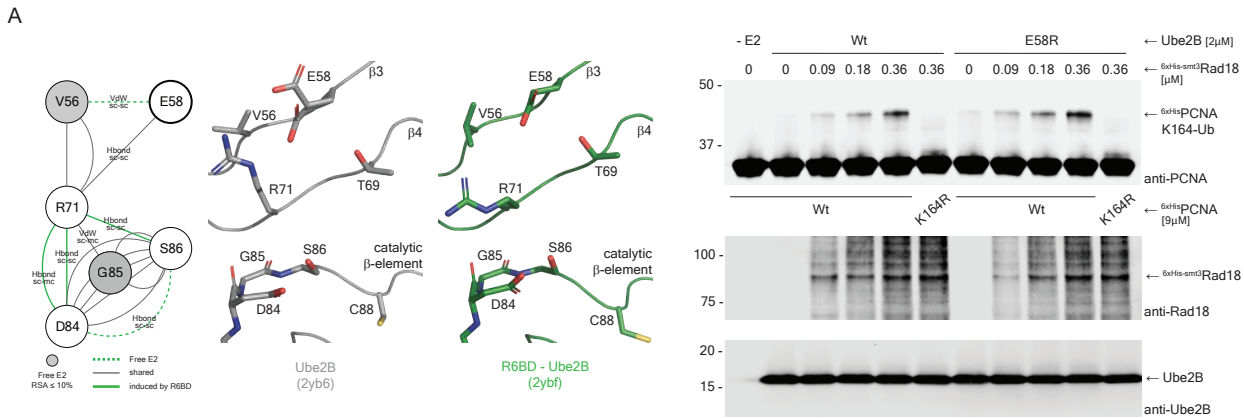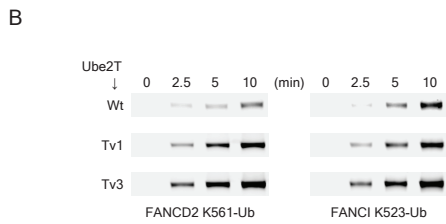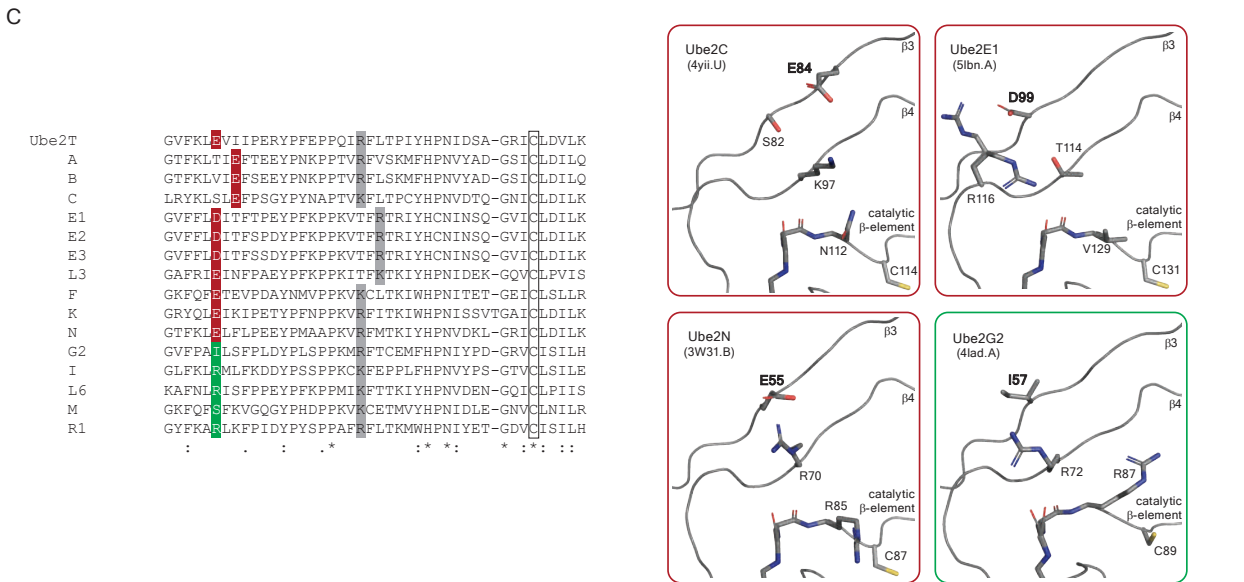

Supplementary Figure 5. Activity profile of deregulated Ube2B and Ube2T variants.

**A.** Comparison of a network scheme (top left) with structures of unbound (top middle, PDB ID 2yb6) and Rad6 Binding Domain (R6BD) bound (top right, PDB ID 2ybf) Ube2B depicting the proposed gating and effector roles for Ube2B residues Glu58 (thick outline) and Arg71 respectively. Green dashed and green lines depict Ube2B edges in unbound and R6BD bound states respectively. Grey lines depict common connections in the two Ube2B states while grey nodes have relative solvent accessibility of less than 10% in unbound E2. Immunoblots of an end-point (90 min) multi-turnover PCNA ubiquitination assay (bottom) shows Ube2B with a permissive Glu54Arg gate is more sensitive to increasing amounts of Rad18 E3 in substrate ubiquitination. Control immunoblots anti-Rad18 (middle) and anti-Ube2B (bottom) show levels of E3 and E2 respectively.

**B.** Representative time-course ubiquitination assays with fluorescently labelled ubiquitin (Ub<sup>IR800</sup>) used to derive substrate ubiquitination rates depicted in Figure 5E. Substrate ubiquitination is analysed by direct fluorescence monitoring (Li-COR Odyssey CLX).

**C.** Sequence alignment of human E2s, with proposed gating residues highlighted (restrictive in red and permissive in green). Highlighted in grey is the proposed effector residue linked with the gate. Ube2T and Ube2B sequences are aligned as reference. Catalytic cysteine is also indicated (clear box). Structures of indicated human E2s with the proposed  $\beta 3$  gating residue (bold label), restrictive in red boxes while permissive in green boxes. Molecular figures prepared in PyMOL (Schrödinger, LLC).

Ube2T allosteric network  
(Edges displayed in Fig. 4A)

net1 - free 2T network  
net2 - RING bound 2T network

| Node 1 # | Node 1 type | Node 2 # | Node 2 type | Interaction | Belongs To | Comp Weight |
|----------|-------------|----------|-------------|-------------|------------|-------------|
| 2        | Q           | 62       | P           | VDW:MC_SC   | net2       | -4.313      |
| 2        | Q           | 62       | P           | VDW:SC_SC   | net2       | -4.043      |
| 2        | Q           | 5        | S           | VDW:MC_SC   | net1       | 4.337       |
| 2        | Q           | 63       | F           | VDW:SC_SC   | net2       | 0.221       |
| 2        | Q           | 5        | S           | HBOND:MC_SC | net2       | -3.12       |
| 3        | R           | 32       | D           | HBOND:SC_MC | net2       | -4.482      |
| 3        | R           | 7        | L           | VDW:MC_SC   | net2       | -4.193      |
| 3        | R           | 32       | D           | VDW:SC_SC   | net1       | 0.212       |
| 3        | R           | 32       | D           | HBOND:SC_SC | net1       | 4.697       |
| 3        | R           | 32       | D           | IONIC:SC_SC | net1       | 4.442       |
| 3        | R           | 5        | S           | HBOND:MC_SC | net2       | -5.321      |
| 7        | L           | 11       | L           | VDW:MC_SC   | net2       | -4.273      |
| 7        | L           | 11       | L           | VDW:SC_SC   | net2       | 0.364       |
| 7        | L           | 34       | L           | VDW:SC_SC   | net2       | -4.119      |
| 11       | L           | 25       | W           | VDW:SC_MC   | net2       | -4.202      |
| 23       | T           | 25       | W           | VDW:MC_SC   | net1       | 0.085       |
| 23       | T           | 25       | W           | VDW:SC_SC   | net2       | 0.399       |
| 25       | W           | 35       | R           | VDW:SC_MC   | net1       | 0.14        |
| 25       | W           | 52       | K           | VDW:SC_SC   | net1       | 4.194       |
| 32       | D           | 34       | L           | VDW:MC_SC   | net1       | 4.319       |
| 32       | D           | 34       | L           | HBOND:MC_MC | net1       | 3.998       |
| 33       | D           | 35       | R           | IONIC:SC_SC | net1       | 4.268       |
| 33       | D           | 35       | R           | HBOND:MC_SC | net1       | 4.225       |
| 34       | L           | 35       | R           | HBOND:MC_SC | net2       | -4.915      |
| 35       | R           | 53       | L           | VDW:SC_MC   | net2       | -4.226      |
| 35       | R           | 52       | K           | VDW:SC_SC   | net2       | 0.035       |
| 35       | R           | 54       | E           | HBOND:SC_SC | net1       | 0.076       |
| 35       | R           | 54       | E           | VDW:SC_SC   | net1       | 4.206       |
| 35       | R           | 53       | L           | HBOND:SC_MC | net2       | -4.803      |
| 37       | Q           | 52       | K           | VDW:SC_SC   | net2       | 0.83        |
| 53       | L           | 69       | R           | VDW:SC_MC   | net1       | 0.055       |
| 54       | E           | 59       | R           | VDW:SC_SC   | net1       | 0.17        |
| 54       | E           | 69       | R           | HBOND:SC_MC | net2       | -5.205      |
| 54       | E           | 69       | R           | IONIC:SC_SC | net1       | 3.786       |
| 60       | R           | 63       | F           | VDW:SC_SC   | net2       | -3.941      |
| 60       | R           | 63       | F           | HBOND:SC_MC | net2       | -4.435      |
| 60       | R           | 64       | E           | IONIC:SC_SC | net2       | -4.912      |
| 60       | R           | 63       | F           | VDW:MC_SC   | net2       | -0.119      |
| 62       | P           | 64       | E           | VDW:MC_MC   | net2       | -4.31       |
| 62       | P           | 98       | W           | VDW:SC_SC   | net2       | -4.334      |
| 63       | F           | 98       | W           | VDW:MC_SC   | net1       | 4.193       |
| 64       | E           | 98       | W           | HBOND:MC_SC | net2       | -3.799      |
| 65       | P           | 91       | K           | VDW:SC_MC   | net2       | -4.229      |
| 69       | R           | 82       | A           | VDW:SC_MC   | net2       | -4.33       |
| 69       | R           | 83       | G           | VDW:MC_MC   | net2       | -4.332      |
| 69       | R           | 83       | G           | HBOND:SC_MC | net2       | -5.449      |
| 69       | R           | 71       | L           | VDW:SC_SC   | net1       | 4.073       |
| 80       | D           | 83       | G           | HBOND:SC_MC | net2       | -2.999      |
| 80       | D           | 81       | S           | HBOND:MC_SC | net2       | -4.785      |
| 80       | D           | 81       | S           | HBOND:SC_SC | net1       | 4.98        |
| 80       | D           | 81       | S           | HBOND:SC_MC | net1       | 4.32        |
| 80       | D           | 82       | A           | HBOND:MC_MC | net1       | 3.093       |
| 80       | D           | 84       | R           | IONIC:SC_SC | net1       | 4.943       |
| 80       | D           | 84       | R           | HBOND:SC_SC | net1       | 3.481       |
| 80       | D           | 124      | L           | VDW:SC_SC   | net1       | -0.044      |
| 81       | S           | 125      | M           | HBOND:SC_SC | net2       | -4.481      |
| 81       | S           | 125      | M           | HBOND:MC_SC | net2       | -4.03       |
| 82       | A           | 84       | R           | VDW:SC_SC   | net2       | -3.889      |
| 84       | R           | 124      | L           | VDW:SC_SC   | net1       | 4.24        |
| 86       | C           | 122      | D           | VDW:SC_MC   | net2       | -4.276      |
| 86       | C           | 122      | D           | VDW:SC_SC   | net2       | 0.371       |
| 86       | C           | 123      | P           | HBOND:SC_MC | net1       | 5.474       |
| 91       | K           | 92       | L           | VDW:SC_MC   | net1       | 4.131       |
| 91       | K           | 95       | K           | VDW:SC_SC   | net1       | -0.508      |
| 91       | K           | 92       | L           | HBOND:SC_MC | net1       | 4.329       |
| 92       | L           | 98       | W           | HBOND:MC_MC | net2       | -5.424      |

|     |   |     |   |             |      |        |
|-----|---|-----|---|-------------|------|--------|
| 119 | N | 122 | D | HBOND:SC_SC | net2 | 1.626  |
| 119 | N | 121 | D | VDW:MC_SC   | net1 | 3.816  |
| 119 | N | 120 | P | VDW:SC_MC   | net2 | -4.047 |
| 119 | N | 120 | P | VDW:SC_SC   | net2 | -0.679 |
| 119 | N | 121 | D | HBOND:MC_MC | net2 | -3.209 |
| 119 | N | 121 | D | HBOND:SC_MC | net2 | -2.972 |
| 119 | N | 122 | D | HBOND:SC_MC | net2 | -3.628 |
| 119 | N | 121 | D | VDW:SC_MC   | net2 | -3.913 |
| 119 | N | 122 | D | VDW:SC_SC   | net2 | -0.117 |
| 120 | P | 122 | D | HBOND:MC_MC | net2 | -3.718 |
| 121 | D | 122 | D | HBOND:SC_MC | net1 | 3.904  |
| 122 | D | 123 | P | VDW:SC_SC   | net1 | 4.329  |
| 123 | P | 125 | M | VDW:SC_MC   | net1 | 4.2    |
